1 **Three-dimensional models of the cervicovaginal epithelia to study host-microbiome interactions**  
2 **and sexually transmitted infections**

3  
4 Vonetta L. Edwards<sup>1,2</sup>, Elias McComb<sup>1,†</sup>, Jason P. Gleghorn<sup>3</sup>, Larry Forney<sup>4</sup>, Patrik M. Bavoil<sup>2,5</sup> and  
5 Jacques Ravel<sup>1,2</sup>

6  
7 <sup>1</sup> Institute for Genome Sciences, University of Maryland School of Medicine, Baltimore MD

8 <sup>2</sup> Department of Microbiology and Immunology, University of Maryland School of Medicine,  
9 Baltimore, MD

10 <sup>3</sup> Department of Biomedical Engineering, University of Delaware, Newark, DE

11 <sup>4</sup> Department of Biological Sciences, University of Idaho, Moscow, ID

12 <sup>5</sup> Department of Microbial Pathogenesis, Baltimore, MD

13 <sup>†</sup> Current address: University of Pennsylvania, Department of Obstetrics and Gynecology,  
14 Philadelphia, PA

15

16 Corresponding author:

17 Jacques Ravel: [jrael@som.umaryland.edu](mailto:jrael@som.umaryland.edu)

18 670 W. Baltimore Street

19 Baltimore, MD 21201

20

21

22 **ABSTRACT** Two-dimensional (2D) cell culture systems have provided controlled,  
23 reproducible means to analyze host-pathogen interactions. Although inexpensive, straightforward, and  
24 requiring very short time commitment, these models recapitulate neither the functionality of multi-  
25 layered cell types nor the microbial diversity of an infected human. Animal models have commonly  
26 been used to recreate the complexity of human infections. However, extensive modifications are  
27 commonly required to recreate interactions that resemble those in the human reproductive tract  
28 microbiologically and physiologically. Three-dimensional (3D) cell culture models have emerged as  
29 alternative means of reproducing key elements of human infections at a fraction of the cost of animal  
30 models and on a scale that allows for replicative experiments to be readily performed. Here we  
31 describe a new 3D model that utilizes transwells with epithelial cells seeded apically and a basolateral  
32 extra cellular matrix (ECM)-like layer containing collagen and fibroblasts. In this system, basal  
33 feeding creates a liquid/air interface on the apical side. The model produced tissues with close  
34 morphologic and physiological resemblance to human cervical and vaginal epithelia, including  
35 observable levels of mucus produced by cervical cells. Infection by both *Chlamydia trachomatis*  
36 and *Neisseria gonorrhoeae* was demonstrated as well as the growth of bacterial species observed in the  
37 human vaginal microbiota, enabling controlled mechanistic analyses of the interactions between host  
38 cells, vaginal microbiota and STI pathogens. Future experiments may include immune cells to mimic  
39 more closely the genital environment. Finally, the modular set up of the model makes it fully  
40 applicable to the analysis of non-genital host-microbiome-pathogen interactions.

41  
42 **IMPORTANCE** Infected sites in humans are a complex mix of host and microbial cell types  
43 interacting with each other to perform specific and necessary functions. The ability to understand the  
44 mechanism(s) that facilitate these interactions, and interactions with external factors is paramount to  
45 being able to develop preventative therapies. Models that attempt to faithfully replicate the complexity  
46 of these interactions are time intensive, costly, and not conducive to high throughput analysis. Two-  
47 dimensional (2D) models that have been used as a platform to understand these interactions, while  
48 cost effective, are generally limiting in experimental flexibility and structural/physiological relevance.  
49 Our three-dimensional (3D) models of the cervicovaginal epithelium can facilitate analysis of  
50 interactions between the host epithelium, sexually transmitted pathogens and bacteria present in the  
51 vaginal microbiota. Due to the modular design, additional cell types and environmental modulators can  
52 be introduced to the system to provide added complexity, approaching conditions in the infected  
53 human host.

54

55 KEYWORDS: three-dimensional model, cervicovaginal epithelium, sexually transmitted infections,  
56 microbiome

57

58 Eukaryotic cell culture systems have been a staple of host-pathogenesis research for decades as  
59 they provide the means to model *in vivo* interactions in a controlled and reproducible *in vitro*  
60 environment. The mainstay of this approach is a flat surface 2-dimensional (2D) model where cells are  
61 grown as a monolayer on a solid impervious surface, usually plastic or glass treated with polymers that  
62 enhance cell adhesion. This method is inexpensive, accommodates many adherent cell types and  
63 imaging of the cells is relatively straightforward [1-3]. While 2D models have provided a wealth of  
64 information on host-pathogen interactions, they do not faithfully reproduce the physiological  
65 complexity of these interactions as they occur within or on the host organism. Notably, 2D cell culture  
66 systems may not be representative of *in vivo* cell morphology, lack true cellular junctional complexes  
67 and fail to account for the effect of differing cell types usually found within the environmental milieu  
68 [3, 4]. Experimentally, the design of the 2D systems is also limiting, as it does not allow the  
69 introduction of an air interface or the incorporation of extracellular matrices (ECM) that produce  
70 needed signaling and crosstalk molecules. This means that many of the predictions derived from 2D  
71 cell culture models do not hold true when applied to *in vivo* situations, as seen in cervical cancer  
72 models [5], and other pathogen-host models [6, 7].

73 To overcome these obstacles, models for multiple diseases and conditions have been developed  
74 in animals. These afford the ability to follow a progressing infection in a complex environment that  
75 can replicate many properties of the human host, e.g., local physiology and host response, but falls  
76 short on many others e.g., the structural and polymicrobial environments. Additional manipulations  
77 and modifications are also often required to maximize susceptibility to human-specific infectious  
78 agents [8-13]. The use of animal models for STI research is further complicated by the need to use  
79 animal-adapted pathogens strains, as is the case with *C. trachomatis*, or alternate species that have  
80 coevolved with their host, as is the case with *Chlamydia caviae* and *Chlamydia muridarum* [14-17].  
81 Lastly, animal models are often expensive to develop and maintain. This high cost may limit the  
82 number of replicate experiments and thus exhaustive investigations are not usually undertaken.

83 Three-dimensional (3D) cell culture models provide a practical, cost-effective alternative to  
84 animal models while also greatly improving the modelling value of 2D culture systems. 3D models can  
85 capture many aspects of the native *in vivo* physiology including cell morphology, organization, and  
86 communication that cannot be replicated in typical 2D models. This includes, but is not limited to, the  
87 ability to replicate complex tissue interactions, create and maintain intercellular interactions including

88 junctional complexes, facilitate differentiation and polarization, mimic cellular behavior and integrate  
89 the site-specific microbial environment [4, 18-26]. Over the past decade various 3D cell culture  
90 reproductive tract model systems have been developed. These range from hydrogels [25, 27], and self-  
91 assembled organoids [3, 28], to microfluidics organ-on-a-chip models [23]. Hydrogels are usually  
92 placed on a scaffold and cells can be grown within or on top of the hydrogel, with 7 to 21 days  
93 necessary for full differentiation. These models have been used to analyze bacterial growth patterns, as  
94 well as targeted aspects of pathogenicity for multiple pathogens including ZIKA, HSV, *Chlamydia*  
95 spp., *Neisseria gonorrhoeae* and HIV [22, 29-34]. Similarly, self-assembled organoids can be grown  
96 either on a scaffold (i.e., collagen-coated beads) or scaffold free where cells are placed in suspension  
97 and self-aggregate to form a more complex structure. Organoid-based models have been used for  
98 mechanistic studies of bacterial pathogenesis [21, 28, 35-38]. 3D models generally closely mimic  
99 infections of multiple pathogens [22, 27, 30, 34, 36, 39] as well as environmental parameters [8, 29,  
100 40] as they occur *in vivo*.

101 Whereas advances in hydrogel-based and organoid-based systems can recapitulate the 3D  
102 environment and multicellular nature needed to mimic aspects of the *in vivo* context, to an extent  
103 reproducibility is difficult owing to their stochastic cellular organization and/or time needed to  
104 establish the model. Organ on-a-chip models can overcome some of these limitations. Microfluidic  
105 modules that integrate parameters such as flow, mechanical stress, and the introduction of multiple  
106 environmental cues in any orientation around the cell(s) of interest can be developed [41-44]. This  
107 allows for organ-like systems that can be functionally maintained for extended periods of time  
108 allowing for more in-depth analysis. [20, 23]. However, the high cost of set up and maintenance of  
109 some of these models may not be feasible for many laboratories interested in studying host-pathogens  
110 interactions of the female reproductive tract. Indeed, there have been limited efforts towards the  
111 development of organ-on-a-chip systems to model infections of the reproductive tract.

112 In this study, we developed and characterized a 3D transwell cell culture model characterized  
113 by morphologically and physiologically differentiated vaginal and cervical epithelial cells that support  
114 the growth of bacteria found in the vaginal milieu and enable infection by both *C. trachomatis* [45] and  
115 *N. gonorrhoeae*. The transwell polyester membrane provides scaffolding support for the epithelial cells  
116 while allowing close proximity to an ECM and fibroblast network. By using the non-cancerous, mucin  
117 producing cell line (A2EN) [46], the model recapitulates critical aspects of the *in vivo* environment  
118 where mucins play an important role [47, 48]. Relatively low cost and short set-up time required to  
119 establish the model, enables the testing of multiple replicates in parallel under multiple conditions in a

120 semi-high throughput process. This model may serve as a primer for the future development of more  
121 elaborate 3D organ-on-a-chip model systems.

122

## 123 RESULTS

124 **The epithelial 3D transwell model structurally resembles *in vivo* cervical and vaginal**  
125 **epithelium.** Transwells, basally coated with collagen and in the presence of human fibroblasts,  
126 mimicking the *in vivo* basement membrane of the epithelium, were used to develop a 3D model of the  
127 female reproductive tract epithelia (Fig. 1). In these models, basal only feeding and air interface  
128 exposure afforded the establishment of vaginal and cervical epithelia that morphologically closely  
129 resemble the structure of these epithelia *in vivo* (Figs. 2 and 3). Polarization of epithelial cells over  
130 time is usually an indication of their stage of development. We initially tested multiple types of  
131 collagen and coating methods to determine optimal conditions. Epithelial barrier integrity was  
132 evaluated using TEER values [49] measured over culture as the epithelial tissue formed. Basal  
133 collagen coating and fibroblast embedding showed a gradual increase in TEER values with peaks of  
134 approximately 600 ohms/cm<sup>2</sup> on day 6 for A2EN cervical epithelial cells (Fig. 2A) and 1000 ohms/cm<sup>2</sup>  
135 on day 8 for VK2 vaginal epithelial cells (Fig. 3A). Other methods of collagen coating and fibroblast  
136 embedding, including apical coating (Figs. 2A and 3A), as well as basal or apical coating with  
137 embedded fibroblasts were tested (data not shown). Embedding of fibroblasts was detrimental to the  
138 integrity of the collagen layer and caused delamination from the transwell membrane.

139 Histology and electron microscopy were used to evaluate the structural and morphological  
140 features of the two epithelial cells models. Hematoxylin and eosin (H&E) staining confirmed the  
141 increased cell density and polarization of A2EN cervical epithelial cells (Fig. 2B) on day 6 as  
142 compared to day 1. Morphologically, the epithelial structure was similar to that observed in  
143 histological images of cervical tissue which comprises a compact single layer of epithelial cells (Fig.  
144 2B). Transmission electron microscopy (TEM) further confirmed these observations. The A2EN  
145 cervical epithelial cells form a monolayer of cells in tight contact with each other. An intact nucleus  
146 and cilia on the surface of the cell were also observed (Fig. 2C).

147 An important feature of cervical cells is their ability to produce mucus [50, 51]. A2EN cervical  
148 epithelial cells were selected for their demonstrated ability to produce mucus in a 2D model; a unique  
149 and important feature of this cell line [46]. Immunostaining for mucin 5B, a major protein component  
150 of mucus, shows that mucus is produced over a significant portion of the apical surface of the A2EN  
151 cervical epithelium (Fig. 2D), thus recapitulating a critical functional property of the cervical  
152 epithelium [51].

153 Histology and electron microscopy imaging of the VK2 vaginal epithelial model revealed a  
154 pronounced stratification at day 8 as compared to day 1 with multiple layers (up to 7) of cells observed  
155 (Fig. 3B and 3C). Further, maturation of VK2 epithelial cells was observed, with more mature cells in  
156 the upper layers and more immature cells in the lower layers. This organization mimics an integral  
157 feature of the vaginal epithelium, as glycogen, a key metabolite supporting the growth of the vaginal  
158 microbiota, accumulates in mature epithelial cells [52].

159 **3D cervical A2EN cells are infected by *Chlamydia trachomatis* and *Neisseria gonorrhoeae*.**  
160 The ability of *C. trachomatis* (Ct) serovar L2 to infect cervical A2EN cells was assessed in both a  
161 conventional 2D model (Fig. 4A) of cells grown on coverslips and in the 3D transwell model described  
162 herein (Fig. 4B). While both models facilitated relatively robust infectivity (Fig. 4C), the A2EN  
163 cervical epithelium 3D model accommodated higher infection (71%) compared to the 2D model (57%)  
164 (p-value 0.019). Both models were both infected with  $2 \times 10^5$  *C. trachomatis* elementary bodies  
165 representing a MOI of 2 and 1 for the 2D and 3D models respectively. Since the MOI was lower for  
166 the A2EN cervical epithelium 3D model, it demonstrated that a more efficient infection can be  
167 achieved in that model. The VK2 vaginal epithelium 3D model was also successfully infected with *C.*  
168 *trachomatis* (data not shown); however, as expected the level of infectivity was low (25%) since *C.*  
169 *trachomatis* predominantly infects cervical epithelial cells. TEM confirmed the infection, visualizing  
170 inclusions containing *C. trachomatis* at various developmental stages (Fig. 4D), with both elementary  
171 bodies (EBs) (infectious particles) and reticulate bodies (RBs) (metabolic/replicating particles)  
172 observed. While A2EN cervical epithelial cells are not robust producers of cytokines [46], we  
173 investigated the profiles of some common cytokines and found appreciable levels of IL-6, IL-8, IP10  
174 and RANTES (Fig. 4E). These results are similar to those observed in Buckner et al [46], where  
175 perceptible levels of IL-6, IL-8, IP10 and RANTES were detected. We observed that the cytokine  
176 response of the model in the presence or absence of a chlamydial infection was similar to that  
177 previously observed in this and other human and mouse cell lines [53-56]. These results indicate that  
178 the A2EN cervical epithelium 3D model could serve as a suitable platform for studies of chlamydial  
179 infection.

180 Another common sexually transmitted pathogen is *N. gonorrhoeae* [57], with anecdotal  
181 evidence suggesting that *N. gonorrhoeae* infection might lead to an increased risk of *C. trachomatis*  
182 infection [58, 59]. Utilizing wildtype and mutants of a common *N. gonorrhoeae* laboratory-adapted  
183 strain FA1090, we showed that transmigration of *N. gonorrhoeae* takes place within 6 hours in the 3D  
184 cervical A2EN model. This is similar to the transmigration period observed with a HEC-1-B 3D cell  
185 model (Fig. 5A), a cell line commonly used to analyze *N. gonorrhoeae* infections [60-63]. TEM

186 imaging shows *N. gonorrhoeae* attached to the surface of the A2EN cells (Fig. 5B), which is the first  
187 step in the pathogenic cycle. These results suggest that the 3D A2EN cervical epithelium model can  
188 also support investigations of *N. gonorrhoeae* pathogenesis.

189 **The 3D vaginal model can sustain the growth of vaginal bacteria.** The vaginal microbiota  
190 plays a key role in the cervicovaginal microenvironment [64]. We developed conditions that afford the  
191 growth of *Lactobacillus crispatus* and *Gardnerella vaginalis* on the 3D vaginal epithelium model.  
192 These two species are prominent members of vaginal bacterial communities that are found in optimal  
193 and non-optimal conditions, respectively [65]. These bacteria were used to inoculate on the 3D vaginal  
194 epithelium model and shown to grow for at least 48h under anaerobic conditions. Growth was first  
195 demonstrated by measuring the pH of culture medium in the apical compartment after 48h of growth.  
196 Media containing *L. crispatus* had a significantly lower pH of ~4.2 as compared to *G. vaginalis* (pH  
197 6.0) (Fig. 6A). As expected, *L. crispatus* acidified the microenvironment, while *G. vaginalis* did not. *In*  
198 *vivo* acidification is driven by the production of lactic acid by *L. crispatus*, typified with a higher  
199 proportion of D(-) lactate as compared to L(+) lactate [66-68]. A concentration of 7.41mM D(-) lactic  
200 acid was observed after 48h of growth with *L. crispatus* compared to 2.42 mM and 2.04mM with *G.*  
201 *vaginalis* or a no bacteria control, respectively (Fig. 6B). This finding demonstrates that *L. crispatus* is  
202 metabolically active and growing on the 3D vaginal epithelium model. Further microscopic analyses  
203 using both TEM (Fig. 6C i, ii, iii) and FISH (Fig. 6C iv, v, vi) showed the presence of live *L. crispatus*  
204 (Fig. 6C ii, v) and *G. vaginalis* (Fig. 6C iii, vi) on the model under anaerobic conditions after 48h  
205 growth. It is important to note that the model was gently rinsed with PBS before fixation thus any non-  
206 adherent bacteria were removed, only bacteria attached to the epithelial surface or embedded in the  
207 mucin matrix were imaged. TEM afforded visualizing the physical localization of the bacteria in close  
208 proximity to the epithelial layer, while FISH staining confirmed the robust growth of the bacteria on  
209 the model. Viability staining (Fig. 6C vii, viii, ix) after 48h of bacterial growth indicated that vaginal  
210 epithelial cells remained viable (green staining on Fig. 6C), in contrast to a control comprising of  
211 epithelial cells exposed to 1% saponin which predominantly stain red and indicate dead cells (Fig. 6C  
212 x).

213  
214  
215  
216  
217

## DISCUSSION

218 2D cell culture models have been extensively used to study host-STI pathogen interactions.  
219 However, these models lack complexity and do not accurately mimic many of the physiological  
220 interactions that occur in host organisms, limiting interpretation and translation to complex human  
221 physiology. More specifically, 2D culture models are unable to recapitulate the native  
222 microenvironment including multicellularity, the composition of extracellular matrices (ECM), or  
223 various physicochemical properties and spatiotemporal molecular gradients [4, 69]. As such, many of  
224 the predictions derived using these 2D cell culture models often do not hold true when applied to  
225 conditions *in vivo*, as seen in cervical cancer models [5] and other pathogen-host models [6, 70]. We  
226 have advanced these models by developing 3D organotypic models of cervical and vaginal epithelia  
227 that include an interstitial compartment of collagen and associated fibroblasts. 3D epithelial models  
228 provide enhanced morphological and physiological cellular structures that can include inter-cellular  
229 interactions (i.e., junctional complexes), complex tissue interactions, differentiated and polarized  
230 epithelial structures, which taken together better mimic *in vivo* cellular behavior [4, 18-23, 25, 28]. The  
231 multi-layered structure of these models affords increases in complexity and experimental flexibility,  
232 such as the potential addition of different cell types, or even immune cells. 3D cell culture models  
233 partly fill a gap between the cost effectiveness of 2D cell culture and the complexity and high cost of  
234 organoids, organ-on-a-chip systems or animal models [8, 9, 11-13]. Animal models can be of limited  
235 use to study host-STI pathogen interactions because they are often lacking anatomical similarity to the  
236 human vaginal epithelium. For example, the lower reproductive tract of the mouse, an animal model  
237 commonly used in STI research, comprises of a keratinized stratified epithelium, while that of human  
238 is not keratinized. The 3D organotypic model we have developed is ideally suited for studies on the  
239 pathogenesis of STIs as it replicates many features of human cervicovaginal epithelia without the  
240 complexity, experiment-to-experiment variability and/or cost of organoids and animals. This proposed  
241 model will ultimately provide a way to study how the cervicovaginal microbiota interact with the host,  
242 and how these interactions increase or reduce the risk of infections by sexually transmitted pathogens.

243 We have shown that the model supports infection by *C. trachomatis* and *N. gonorrhoeae*, two  
244 of the most prevalent infections worldwide. *C. trachomatis* is an obligate human pathogen that requires  
245 host internalization for propagation while *N. gonorrhoeae* can replicate both outside and inside of  
246 epithelial cells. The 3D cervical model was able to reproduce characteristic features of infection by  
247 both pathogens. One can envision using these models to study co-infections or the role of a primary  
248 infection by *C. trachomatis* in susceptibility to infection by *N. gonorrhoeae*, or vice versa. Other  
249 potential co-infections, including with HSV, HPV or HIV could also be investigated. The model can be



250 enhanced further by adding more complex structures such as endothelial and/or immune cells to the  
251 basal compartment.

252         Importantly, the ability to grow vaginal bacteria on the 3D models of the vaginal and cervical  
253 epithelia is a critical first step toward modeling the *in vivo* complex microenvironment that includes a  
254 functional microbiota. Little is known about how the vaginal microbiota contributes to modulating the  
255 risk to STIs. Previous studies have postulated that indole-producing bacterial species such as  
256 *Prevotella*, *Petpostreptococcus* or *Peptinophilus* spp. can facilitate *C. trachomatis* replication [71-73],  
257 since *C. trachomatis* can use indole to synthesize tryptophan, an essential amino acid that genital *C.*  
258 *trachomatis* strains are incapable of producing. Tryptophan is present in the host extracellular and  
259 cytoplasmic compartments but can be depleted through the action of interferon (IFN)- $\gamma$  which induces  
260 tryptophan catabolism by indoleamine-2,3-dioxygenase I (IDO) [74]. Mechanisms such as this have  
261 been difficult to study for at least three reasons: (1) it is unethical to perform many of these  
262 experiments in humans; (2) there are no cellular or biomimetic models of the cervicovaginal  
263 environment that include the microbiota; and (3) key features of the cervicovaginal space such as the  
264 dominance of *Lactobacillus* spp. and a low environmental pH (<4.5) are not found in other mammals  
265 that might otherwise be candidate animal models [75-77]. The 3D models developed in this study  
266 represent the first steps toward more advanced models that include complex microbiota. This  
267 component is critical, as the cervicovaginal microbiota exists in a mutualistic relationship with the  
268 cervicovaginal epithelium and is believed to play an important role in the risk to STIs. The microbiota  
269 is thought to constitute the first line of defense against STIs, but the mechanism(s) by which it exerts  
270 its protective effect(s) is/are unknown. Access to a model that reproduces the physiology and  
271 microbiology of the cervicovaginal space is thus critical. We have previously shown that an optimal  
272 microbiota dominated by *Lactobacillus* species, such as *L. crispatus*, produces copious amounts of  
273 lactic acid and a concomitant low environmental pH (<4.5). Lactic acid does not directly affect *C.*  
274 *trachomatis* bacteria but acts on the epithelium by decreasing epithelial cell proliferation, thus  
275 significantly inhibiting the infection process [45]. On the other hand, microbiota compositions  
276 associated with an increased risk to STIs tend to be similar to those observed in association with  
277 bacterial vaginosis (BV). BV is a condition that is generally defined by a high pH (>4.5), a microbiota  
278 characterized by the absence of *Lactobacillus* spp. and the presence of an array of strict and facultative  
279 anaerobes such as *G. vaginalis*, *Atopobium vaginae*, and *Prevotella* spp. The mechanisms by which a  
280 STI-permissive microbiota increase the risk to infection remains poorly understood. Based on our  
281 previous research we posit that a non-permissive indigenous microbiota interacts with the  
282 cervicovaginal epithelium to establish a homeostatic state that blocks STI and/or reduces disease

283 severity. Conversely, we propose that a permissive microbiota disrupts host epithelial cell homeostasis,  
284 thereby allowing STI to progress. Establishing reconstituted STI-permissive or non-permissive  
285 microbiota on an advanced 3D epithelial models will go a long way toward testing these hypotheses  
286 and improving our knowledge of the pathogenesis of STIs.

287 The 3D models developed in this study uses relatively inexpensive materials compared to  
288 organoids or organ-on-a-chip systems. These low-cost models afford performing replicate experiments  
289 in a semi high-throughput setup. In addition, this 3D model allows performing different analyses from  
290 one or replicate transwells, including resistance readings, measurements of pH, metabolite  
291 concentrations (i.e., lactate), cytokine concentrations, bacterial enumeration, and imaging  
292 (fluorescence, TEM) or omic analysis (DNA/RNA sequencing, proteomics, among others). Lastly,  
293 while we developed this system with A2EN cervical and VK2 vaginal cell lines, there is no barrier to  
294 using different cell lines more appropriate to the research questions at stake, or even from different  
295 organ systems or tissues.

296

## 297 **MATERIALS AND METHODS**

298 Abbreviations and all catalog numbers are listed in the supplemental materials.

299 **Cell Culture Model: collagen coating.** Transwell inserts (Corning #3472) were removed from  
300 the 24-well plate using glass pipettes or tweezers and placed in an inverted orientation into 12-well  
301 plates. To form the collagen coating, all solutions were chilled and placed on ice. 200 $\mu$ l 5X RPMI (1:1  
302 mixture of 10X RPMI and tissue culture (TC) water) (Sigma #R1145) and 25 $\mu$ l 1M NaOH (Sigma  
303 #S5881) were combined and vortexed thoroughly for 10 secs. Rat tail collagen (800 $\mu$ l; Corning  
304 #354236) was added with gentle pipetting to avoid introducing excessive bubbles, and the pH of the  
305 mixture was tested. Additional NaOH or RPMI was added in 1 $\mu$ l or 10 $\mu$ l increments if needed to attain  
306 a pH of 6.5 (the final mixture should have a salmon pink color). A total of 70 $\mu$ l of the collagen mixture  
307 was added to the basal surface of each transwell insert, the plate was covered ensuring no contact with  
308 the collagen surface and the collagen allowed to gel in a Biosafety Level 2 (BSL2) hood at room  
309 temperature for ~30 min. (Fig. 1A). Using clean glass pipettes or tweezers the inserts were returned to  
310 the 24-well plate in the standard orientation and left under the hood for an additional 3h before transfer  
311 to 4°C for 48-72h.

312 **Cell Culture Model: addition of fibroblasts.** After 48-72h, the transwells were inverted into a  
313 12-well plate using glass pipettes or tweezers. BJ fibroblast cells (ATCC #CRL 2522) at 70-90%  
314 confluency after growth in BJ complete medium (DMEM media (Cellgro #15-013-CV) supplemented  
315 with 10% FBS (Sigma #F4135)) were trypsinized using 1ml of 0.25% Trypsin (Gibco #25200-056)

316 and cell number determined using the Countess Automated Cell Counter. A total of  $3 \times 10^4$  cells in a  
317 volume of 75-80 $\mu$ l were added to the basal surface of the transwells on top of the collagen (Fig. 1B).  
318 The dish was covered and placed in a 37°C, 5% CO<sub>2</sub> incubator for 6h. Inserts were then transferred to  
319 the 24-well plate in the standard orientation and BJ complete medium added (200 $\mu$ l to the apical  
320 compartment, 500 $\mu$ l to the basal compartment). The transwells were then returned to the incubator for  
321 an additional ~42h.

322 **Cell Culture Model: addition of epithelial cells.** Either A2EN cervical epithelial cells (kindly  
323 provided by Dr. Allison Quayle [46]) or VK2/E6/E7 vaginal epithelial cells (ATCC #CRL 2616) were  
324 used to make cervical or vaginal models respectively. A2EN cervical cells were grown in A2EN  
325 complete medium (EpiLife media (Gibco #MEPICFPRF) with 100X EDGS supplement (Gibco #S-  
326 012-5) and 100X L-glutamine (Lonza #17-605E)) while VK2/E6/E7 vaginal cells (ATCC #CRL 2616)  
327 grown in VK2 complete medium (Keratinocyte-SFM (with BPE and EGF) (Gibco #10725-018)  
328 supplemented with 0.4M calcium chloride (Amresco #E506) and 100X L-glutamine (Lonza #17-  
329 605E)). Cells were grown until 70-90% confluent then trypsinized using 1ml of 0.25% Trypsin. The  
330 number of cells was determined using the Countess Automated Cell Counter. BJ complete medium  
331 was removed from the transwells which were then gently rinsed with 500 $\mu$ l PBS. To seed the epithelial  
332 cell layer, using A2EN or VK2 complete medium (cervical and vaginal model respectively) a total of  
333  $1 \times 10^5$  epithelial cells in 200  $\mu$ l of media was added to the apical compartment and 500  $\mu$ l of media was  
334 added to the basal compartment and the plate returned to the incubator. After 48h the apical and basal  
335 media were removed by vacuum aspiration and fresh medium added to the basal compartment only, to  
336 create an epithelial- air interface. Fresh medium (500 $\mu$ l) was added to the basal compartment every  
337 other day. Following culture A2EN: 6 days and VK2: 8 days epithelial cells were polarized and no  
338 medium could be observed entering the apical compartment from the basal compartment, indicating  
339 stable epithelial barrier formation.

340 ***Chlamydia trachomatis* infection, microscopy imaging and cytokine analysis.** *C.*  
341 *trachomatis* serovar L2 (strain LGV/434/Bu) was propagated in HeLa monolayers as previously  
342 described in Tan *et al.* [78]. Briefly, serovar L2 was cultivated in 100mm<sup>2</sup> tissue culture dishes  
343 containing HeLa cells grown at 37°C, 5% CO<sub>2</sub>. Monolayers were gently rocked for 2h, fresh medium  
344 was added, and the infection was allowed to progress for 48h. Lysates were harvested, and inclusion-  
345 forming units (IFUs) calculated and stored in sucrose phosphate glutamate (SPG) [78] at -80°C. Seeds  
346 were used directly from -80°C stocks. *C. trachomatis* was inoculated at a multiplicity of infection  
347 (MOI) of 1 or 2.

348 The 3D model was inoculated with 50 $\mu$ l *C. trachomatis* in the apical compartment and rocked  
349 for 2h at room temperature. The *C. trachomatis* suspension was removed by pipetting, the cells were  
350 rinsed with 500 $\mu$ l PBS, fresh medium (500 $\mu$ l) added basally, and the model was incubated for an  
351 additional 46h at 37°C, 5% CO<sub>2</sub>.

352 Following infection, the transwells were prepped for imaging as described in the fluorescence  
353 staining section and images were obtained using a Zeiss Duo 5 confocal microscope and 3 consecutive  
354 Z stack slices were compressed to create images for confocal analysis. For electronic microscopy, the  
355 transwells were placed in glutaraldehyde fixative for processing and imaged on the Tecnai T12  
356 Transmission Electron microscope. For comparative purposes A2EN cells were grown on coverslips  
357 (2D) for 2 days and then infected with *C. trachomatis* at MOI 2 [79]. Infection and staining were  
358 performed as described below with images obtained using a Zeiss Axio Imager Z1 (Zeiss). Infected  
359 cells were manually identified using the ImageJ software (NIH).

360 For cytokine analysis, medium was removed from the basal compartment and stored at -80°C.  
361 Seven cytokines: EGF, IL-6, IL-8, IP10, MDC, PDGF-AA and RANTES were analyzed using a  
362 Luminex Multianalyte assay at the UMB Cytokine Core Laboratory.

363 ***Neisseria gonorrhoeae* infection and analysis.** 3D models containing 2x10<sup>5</sup> A2EN cells was  
364 exposed apically to 100 $\mu$ l of *N. gonorrhoeae* FA1090 wildtype or *N. gonorrhoeae* Opaless (all *opa*  
365 genes deleted) or *N. gonorrhoeae*  $\Delta$ *pilE* $\Delta$ *opa* (*pilE* and all *opa* genes deleted) at MOI of 10 for 6h at  
366 37°C, 5% CO<sub>2</sub>. The basal medium (500 $\mu$ l) was then removed and dilutions were plated on GCK agar  
367 plates to determine the number of *N. gonorrhoeae* bacteria that transmigrated within the 6h incubation  
368 period. For comparison 2x10<sup>5</sup> HEC-1-B endometrial cells utilizing the same 3D set-up were exposed in  
369 parallel and the transmigrated *N. gonorrhoeae* bacteria were quantified.

370 **Bacterial growth (*L. crispatus*, *G. vaginalis*) and microscopy imaging.** The optical densities  
371 (OD) of bacterial cultures grown overnight in their respective media (*L. crispatus* in NYCIII and *G.*  
372 *vaginalis* in TSB+5% horse serum) were determined using an OD to colony forming units (CFU)  
373 conversion of 1 OD represents 1x10<sup>9</sup> CFU. A volume corresponding to 2x10<sup>8</sup> CFUs was added to the  
374 experiment culture medium (a 2:1 mixture of complete cell culture medium: bacteria culture medium)  
375 to produce a final volume of 1ml. A 10-fold dilution was then performed using experiment culture  
376 medium and 100 $\mu$ l was added to the apical compartment of the model (1x10<sup>6</sup> CFU). Cells exposed to  
377 bacteria or medium only (no bacteria control) were incubated for 48h under anaerobic conditions in a  
378 37°C incubator within a Coy chamber. Aliquots of media were removed from the apical compartment  
379 and the pH determined using an Apera Instruments PH8500 portable pH meter. Aliquots of 50 $\mu$ l were

380 used to determine the D(-) and L(+) lactic acid concentrations using the Boehringer Mannheim/R-  
381 Biopharm D-Lactic acid/L-Lactic acid kit as per manufacturer's instructions. Cells were gently rinsed  
382 with PBS and either fixed in 2.5% glutaraldehyde (TEM imaging) or 2% PFA (fluorescence imaging).  
383 Cells for TEM imaging were taken to the Electron Microscopy Core Imaging facility for further  
384 processing and imaging as described below. Cells for fluorescence *in situ* hybridization (FISH)  
385 imaging were processed as described below and imaged on a Zeiss Duo 5 confocal microscope and 5  
386 consecutive Z stack slices were compressed to create images. Cells for histology and cell viability  
387 imaging were processed as described below and imaged on a Zeiss Duo 5 confocal microscope where  
388 3 consecutive Z stack slices were compressed to create images (viability) or a Zeiss Primo Star  
389 (histology).

390 **Hematoxylin and Eosin (H&E) staining.** The transwell membrane was excised from the  
391 support by rinsing the cell surface with PBS and cutting the perimeter of the membrane with a No. 11  
392 blade on a scalpel. The membrane was then placed between two 32x25x3mm biopsy pads and secured  
393 in a histology cassette. The cassette was immersed in 10% formalin fixative solution for 24h and then  
394 processed by the UMB Pathology Histology Core using SOP NH306. Briefly, slides were placed in  
395 hematoxylin, rinsed with water, dipped in acid alcohol, rinsed with water, then sequentially placed in  
396 80% ethanol, eosin, 95% ethanol twice, 100% ethanol twice and xylene thrice. Mounting media and a  
397 coverslip were then added. Resultant slices were imaged at 100X on the Zeiss Primo Star microscope  
398 (Zeiss).

399 **Fluorescence staining.** Briefly, cells were rinsed once with 500µl of Dulbecco's Phosphate  
400 Buffered Saline (PBS), fixed with 4% paraformaldehyde (PFA) for 30 min and permeabilized with  
401 200µl 0.25% Triton X-100 in PBS for 10 min, followed by treatment with 300µl 0.1% Triton X-100 in  
402 PBS/Fish skin gelatin (FSG) (0.66%) for 20 min. The cells were then stained for chlamydial IFUs with  
403 10µl of 5µg/ml of mouse anti-human chlamydia LPS (primary Ab) (US Biological, MA) in Triton X-  
404 100/PBS/FSG solution for 90 min. Secondary antibody staining was done by adding 2µl of 200µg/ml  
405 of goat anti-mouse Alexa Fluor 488 in Triton X-100/PBS/FSG solution and incubated 60 min in the  
406 dark. Host cells were stained with 2µl of 500µg/ml Hoechst in Triton X-100/PBS/FSG solution for 10  
407 min in the dark. Chlamydial inclusions stained green while host cells nuclei stained blue. Cells were  
408 imaged using a Zeiss Duo 5 confocal microscope and 3 consecutive Z stack slices were compressed to  
409 create images for analysis.

410 **Transmission electron microscopy (TEM) staining.** Cells were rinsed with PBS after  
411 removal of media and fixed in 500µl of 2% paraformaldehyde, 2.5% glutaraldehyde and 0.1 M PIPES

412 buffer (pH 7.4) for at least 1 hour. Cells were then washed with 500 $\mu$ l of 0.1 M PIPES, quenched with  
413 500 $\mu$ l of 50mM glycine in 0.1 M PIPES buffer (pH 7) for 15 minutes, washed and post-fixed in 200 $\mu$ l  
414 of 1% (w/v) osmium tetroxide and 0.75% ferrocyanide in 0.1M PIPES buffer at 4°C for 60 min.  
415 Following washing, transwell membranes were sliced off the holding cup, stained with 200 $\mu$ l of 1%  
416 (w/v) uranyl acetate in water for 60 min, dehydrated by passage through a graduated ethanol series and  
417 embedded in spurr's resin (Electron Microscopy Sciences, PA) following the manufacturer's  
418 recommendations. Resin blocks were trimmed perpendicular to the monolayer grown on the transwell  
419 membrane. Ultrathin sections ~70nm thickness were cut on a Leica UC6 ultramicrotome (Leica  
420 Microsystems, Inc., Bannockburn, IL) and collected onto formva film coated SynapTek NOTCH-DOT  
421 grids (Electron Microscopy Sciences, Hatfield, PA) and examined in a Tecnai T12 transmission  
422 electron microscope (Thermo Fisher Scientific, formerly FEI. Co., Hillsboro, OR) operated at 80 keV.  
423 Digital images were acquired by using a bottom mount CCD camera and AMT600 software  
424 (Advanced Microscopy Techniques, Corp, Woburn, MA).

425 **Fluorescence *in situ* hybridization (FISH) staining.** Cells were stained using a protocol  
426 modified from Meaburn et al. [80]. Briefly, cells were rinsed and fixed overnight at 4°C with 2% PFA  
427 then incubated in 200 $\mu$ l of 0.5% saponin/ 0.5% Triton X100/ PBS mixture for 40 min. This was  
428 followed by the addition of 200 $\mu$ l of 1N HCL for 20 min, 2X SSC for 10 min and 50% formamide/2X  
429 SSC for 30 min incubations. Cells were then incubated in 300 $\mu$ l of the hybridization mix containing  
430 the FISH probe EUB338-ATT0 for 10 min at 85°C then overnight in a humidity box at 37°C. Cells  
431 were washed with 500 $\mu$ l of multiple buffers (a) 50% formamide/2X SSC buffer at 45°C, (b) 1X SSC  
432 buffer at 45°C and (c) 0.05% Tween-20 in 4X SSC buffer at room temperature. Cells were then  
433 incubated with 300 $\mu$ l of Hoechst at 1:500 for 10 min and mounted for imaging. Cells were imaged on  
434 the Zeiss Duo 5 microscope (Zeiss) using the 63X objective with 488 and 546 filters.

435 **Viability staining.** At 48h post-infection cells were incubated with 300 $\mu$ l of 4  $\mu$ M Calcein-AM  
436 and 2  $\mu$ M EthD-III from the Viability/Cytotoxicity Assay Kit for Animal Live and Dead cells (Biotium  
437 30002-T) for 45 min at room temperature as per manufacturer's recommendations. Cells were imaged  
438 at 40X using the 488nm and 543nm excitation wavelengths on the Zeiss Duo 5 microscope (Zeiss). A  
439 composite overlay of 3 Z stack slices were used to create a 3D image.

440  
441  
442  
443

444 ACKNOWLEDGEMENTS:

445 The authors would like to thank Dr. Alison Quayle for kindly providing the A2EN cell line, Dr. Ru-  
446 ching Hsia and the staff of the University of Maryland-Baltimore Electron Microscopy Core for  
447 preparing cells for EM imaging. Dr. Joseph Mauban of the University of Maryland-Baltimore  
448 Confocal Microscope Core for advice and assistance on the confocal microscope. University of  
449 Maryland School of Medicine's Center for Innovative Biomedical Resources, Histology Core and  
450 Cytokine Core – Baltimore, Maryland for providing advice, sectioning, and staining or running the  
451 samples for analysis.

452

453 FUNDING:

454 Research reported in this publication was supported by the National Institute for Allergy and Infectious  
455 Diseases of the National Institutes of Health under awards number U19AI084044 and U19AI158930.

456

457 AUTHOR CONTRIBUTIONS

458 J.R., P.M.B. and V.L.E designed research; V.L.E. and E.M. performed research; V.L.E. and E.M.  
459 analyzed data; V.L.E., J.R., P.M.B., J.P.G., and L.J.F. wrote the paper; J.R., J.P.G. and P.M.B.  
460 obtained funding.

461

462

463 CONFLICTS

464 J.R. is co-founder of LUCA Biologics, a biotechnology company focusing on translating microbiome  
465 research into live biotherapeutics drugs for women's health. All other authors declare that they have no  
466 competing interests.

467

468

469

470 **REFERENCES**

- 471 1. Hurley BP, McCormick BA. Translating tissue culture results into animal models: the case  
472 of *Salmonella typhimurium*. *Trends Microbiol.* 2003;11(12):562-9. Epub 2003/12/09. doi:  
473 10.1016/j.tim.2003.10.002. PubMed PMID: 14659688.
- 474 2. Abbott A. Cell culture: biology's new dimension. *Nature.* 2003;424(6951):870-2. Epub  
475 2003/08/22. doi: 10.1038/424870a. PubMed PMID: 12931155.
- 476 3. Barrila J, Radtke AL, Crabbé A, Sarker SF, Herbst-Kralovetz MM, Ott CM, et al. Organotypic  
477 3D cell culture models: using the rotating wall vessel to study host–pathogen interactions.  
478 *Nature Reviews Microbiology.* 2010;8(11):791-801. doi: 10.1038/nrmicro2423.
- 479 4. Schmeichel KL, Bissell MJ. Modeling tissue-specific signaling and organ function in three  
480 dimensions. *J Cell Sci.* 2003;116(Pt 12):2377-88. Epub 2003/05/27. doi: 10.1242/jcs.00503.  
481 PubMed PMID: 12766184; PubMed Central PMCID: PMCPMC2933213.
- 482 5. Karolina Zuk A, Wen X, Dilworth S, Li D, Ghali L. Modeling and validating three  
483 dimensional human normal cervix and cervical cancer tissues in vitro. *J Biomed Res.*  
484 2017;31(3):240-7. Epub 2017/08/16. doi: 10.7555/JBR.31.20160150. PubMed PMID:  
485 28808216; PubMed Central PMCID: PMCPMC5460612.
- 486 6. Drummond CG, Nickerson CA, Coyne CB. A Three-Dimensional Cell Culture Model To  
487 Study Enterovirus Infection of Polarized Intestinal Epithelial Cells. *mSphere.* 2016;1(1). Epub  
488 2016/06/16. doi: 10.1128/mSphere.00030-15. PubMed PMID: 27303677; PubMed Central  
489 PMCID: PMCPMC4863623.
- 490 7. Jonathan David NMS, Mitali Sarkar-Tyson. The use of a three-dimensional cell culture  
491 model to investigate host–pathogen interactions of *Francisella tularensis* in human lung epithelial  
492 cells. *Microbes and Infection.* 2014;16(9):735-45. Epub 4 May 2014.
- 493 8. Herbst-Kralovetz MM, Pyles RB, Ratner AJ, Sycuro LK, Mitchell C. New Systems for  
494 Studying Intercellular Interactions in Bacterial Vaginosis. *J Infect Dis.* 2016;214 Suppl 1:S6-S13.  
495 Epub 2016/07/28. doi: 10.1093/infdis/jiw130. PubMed PMID: 27449872; PubMed Central  
496 PMCID: PMCPMC4957508.
- 497 9. Raterman EL, Jerse AE. Female Mouse Model of *Neisseria gonorrhoeae* Infection. *Methods*  
498 *Mol Biol.* 2019;1997:413-29. Epub 2019/05/24. doi: 10.1007/978-1-4939-9496-0\_24. PubMed  
499 PMID: 31119637.
- 500 10. Llewellyn GN, Seclen E, Wietgreffe S, Liu S, Chateau M, Pei H, et al. Humanized Mouse  
501 Model of HIV-1 Latency with Enrichment of Latent Virus in PD-1(+) and TIGIT(+) CD4 T Cells. *J*  
502 *Virology.* 2019;93(10). Epub 2019/03/08. doi: 10.1128/JVI.02086-18. PubMed PMID: 30842333;  
503 PubMed Central PMCID: PMCPMC6498059.
- 504 11. Lavender KJ, Pace C, Sutter K, Messer RJ, Pouncey DL, Cummins NW, et al. An advanced  
505 BLT-humanized mouse model for extended HIV-1 cure studies. *AIDS.* 2018;32(1):1-10. Epub  
506 2017/11/08. doi: 10.1097/QAD.0000000000001674. PubMed PMID: 29112072; PubMed  
507 Central PMCID: PMCPMC5718929.
- 508 12. Dutow P, Wask L, Bothe M, Fehlhaber B, Laudeley R, Rheinheimer C, et al. An optimized,  
509 fast-to-perform mouse lung infection model with the human pathogen *Chlamydia trachomatis*  
510 for in vivo screening of antibiotics, vaccine candidates and modified host-pathogen interactions.  
511 *Pathogens and disease.* 2016;74(2). Epub 2015/12/18. doi: 10.1093/femspd/ftv120. PubMed  
512 PMID: 26676260.
- 513 13. Pal S, Tifrea DF, Zhong G, de la Maza LM. Transcervical Inoculation with *Chlamydia*  
514 *trachomatis* Induces Infertility in HLA-DR4 Transgenic and Wild-Type Mice. *Infect Immun.*  
515 2018;86(1). Epub 2017/10/19. doi: 10.1128/IAI.00722-17. PubMed PMID: 29038126; PubMed  
516 Central PMCID: PMCPMC5736824.



- 517 14. Lutz-Wohlgroth L, Becker A, Brugnera E, Huat ZL, Zimmermann D, Grimm F, et al.  
518 Chlamydiales in guinea-pigs and their zoonotic potential. *J Vet Med A Physiol Pathol Clin Med.*  
519 2006;53(4):185-93. Epub 2006/04/25. doi: 10.1111/j.1439-0442.2006.00819.x. PubMed PMID:  
520 16629952.
- 521 15. Rank RG, Sanders MM. Pathogenesis of endometritis and salpingitis in a guinea pig model  
522 of chlamydial genital infection. *Am J Pathol.* 1992;140(4):927-36. Epub 1992/04/01. PubMed  
523 PMID: 1562052; PubMed Central PMCID: PMCPMC1886353.
- 524 16. Shaw JH, Behar AR, Snider TA, Allen NA, Lutter EI. Comparison of Murine Cervicovaginal  
525 Infection by Chlamydial Strains: Identification of Extrusions Shed In vivo. *Front Cell Infect*  
526 *Microbiol.* 2017;7:18. Epub 2017/02/22. doi: 10.3389/fcimb.2017.00018. PubMed PMID:  
527 28217555; PubMed Central PMCID: PMCPMC5289954.
- 528 17. Zhang YX, Fox JG, Ho Y, Zhang L, Stills HF, Jr., Smith TF. Comparison of the major outer-  
529 membrane protein (MOMP) gene of mouse pneumonitis (MoPn) and hamster SFPD strains of  
530 *Chlamydia trachomatis* with other *Chlamydia* strains. *Mol Biol Evol.* 1993;10(6):1327-42. Epub  
531 1993/11/01. doi: 10.1093/oxfordjournals.molbev.a040079. PubMed PMID: 8277858.
- 532 18. Harrington H, Cato P, Salazar F, Wilkinson M, Knox A, Haycock JW, et al.  
533 Immunocompetent 3D model of human upper airway for disease modeling and in vitro drug  
534 evaluation. *Mol Pharm.* 2014;11(7):2082-91. Epub 2014/03/19. doi: 10.1021/mp5000295.  
535 PubMed PMID: 24628276; PubMed Central PMCID: PMCPMC4086737.
- 536 19. Barrila J, Crabbe A, Yang J, Franco K, Nydam SD, Forsyth RJ, et al. Modeling Host-Pathogen  
537 Interactions in the Context of the Microenvironment: Three-Dimensional Cell Culture Comes of  
538 Age. *Infect Immun.* 2018;86(11). Epub 2018/09/06. doi: 10.1128/IAI.00282-18. PubMed PMID:  
539 30181350; PubMed Central PMCID: PMCPMC6204695.
- 540 20. Gargus ES, Rogers HB, McKinnon KE, Edmonds ME, Woodruff TK. Engineered  
541 reproductive tissues. *Nat Biomed Eng.* 2020;4(4):381-93. Epub 2020/04/07. doi:  
542 10.1038/s41551-020-0525-x. PubMed PMID: 32251392; PubMed Central PMCID:  
543 PMCPMC7416444.
- 544 21. Orabi H, Saba I, Rousseau A, Bolduc S. Novel three-dimensional autologous tissue-  
545 engineered vaginal tissues using the self-assembly technique. *Translational research : the journal*  
546 *of laboratory and clinical medicine.* 2017;180:22-36. Epub 2016/08/21. doi:  
547 10.1016/j.trsl.2016.07.019. PubMed PMID: 27543901.
- 548 22. Zhu Y, Yang Y, Guo J, Dai Y, Ye L, Qiu J, et al. Ex vivo 2D and 3D HSV-2 infection model  
549 using human normal vaginal epithelial cells. *Oncotarget.* 2017;8(9):15267-82. Epub 2017/02/02.  
550 doi: 10.18632/oncotarget.14840. PubMed PMID: 28146426; PubMed Central PMCID:  
551 PMCPMC5362485.
- 552 23. Xiao S, Coppeta JR, Rogers HB, Isenberg BC, Zhu J, Olalekan SA, et al. A microfluidic culture  
553 model of the human reproductive tract and 28-day menstrual cycle. *Nature communications.*  
554 2017;8:14584. Epub 2017/03/30. doi: 10.1038/ncomms14584. PubMed PMID: 28350383;  
555 PubMed Central PMCID: PMCPMC5379057.
- 556 24. Hjelm BE, Berta AN, Nickerson CA, Arntzen CJ, Herbst-Kralovetz MM. Development and  
557 characterization of a three-dimensional organotypic human vaginal epithelial cell model. *Biol*  
558 *Reprod.* 2010;82(3):617-27. Epub 2009/12/17. doi: 10.1095/biolreprod.109.080408. PubMed  
559 PMID: 20007410; PubMed Central PMCID: PMCPMC6366157.
- 560 25. Ogawa-Tominaga M, Umezu T, Nakajima T, Tomooka Y. Stratification of mouse vaginal  
561 epithelium. 1. Development of three-dimensional models in vitro with clonal cell lines. *Biol*  
562 *Reprod.* 2018;99(4):718-26. Epub 2018/05/17. doi: 10.1093/biolre/i0y114. PubMed PMID:  
563 29767686.

- 564 26. Millar-Haskell CS, Dang AM, Gleghorn JP. Coupling synthetic biology and programmable  
565 materials to construct complex tissue ecosystems. *MRS Commun.* 2019;9(2):421-32. Epub  
566 2019/09/06. doi: 10.1557/mrc.2019.69. PubMed PMID: 31485382; PubMed Central PMCID:  
567 PMC6724541.
- 568 27. Pyles RB, Vincent KL, Baum MM, Elsom B, Miller AL, Maxwell C, et al. Cultivated vaginal  
569 microbiomes alter HIV-1 infection and antiretroviral efficacy in colonized epithelial multilayer  
570 cultures. *PLoS One.* 2014;9(3):e93419. Epub 2014/03/29. doi: 10.1371/journal.pone.0093419.  
571 PubMed PMID: 24676219; PubMed Central PMCID: PMC3968159.
- 572 28. Hjelm BE, Berta AN, Nickerson CA, Arntzen CJ, Herbst-Kralovetz MM. Development and  
573 Characterization of a Three-Dimensional Organotypic Human Vaginal Epithelial Cell Model.  
574 *Biology of Reproduction.* 2010;82(3):617-27. doi: 10.1095/biolreprod.109.080408.
- 575 29. Medina-Colorado AA, Vincent KL, Miller AL, Maxwell CA, Dawson LN, Olive T, et al. Vaginal  
576 ecosystem modeling of growth patterns of anaerobic bacteria in microaerophilic conditions.  
577 *Anaerobe.* 2017;45:10-8. Epub 2017/05/01. doi: 10.1016/j.anaerobe.2017.04.014. PubMed  
578 PMID: 28456518; PubMed Central PMCID: PMC5726262.
- 579 30. Amerson-Brown MH, Miller AL, Maxwell CA, White MM, Vincent KL, Bourne N, et al.  
580 Cultivated Human Vaginal Microbiome Communities Impact Zika and Herpes Simplex Virus  
581 Replication in ex vivo Vaginal Mucosal Cultures. *Front Microbiol.* 2018;9:3340. Epub  
582 2019/01/30. doi: 10.3389/fmicb.2018.03340. PubMed PMID: 30692980; PubMed Central  
583 PMCID: PMC6340164.
- 584 31. Nogueira AT, Braun KM, Carabeo RA. Characterization of the Growth of Chlamydia  
585 trachomatis in In Vitro-Generated Stratified Epithelium. *Front Cell Infect Microbiol.* 2017;7:438.  
586 Epub 2017/10/27. doi: 10.3389/fcimb.2017.00438. PubMed PMID: 29067282; PubMed Central  
587 PMCID: PMC5641298.
- 588 32. Gorwood J, Bourgeois C, Mantecon M, Atlan M, Pourcher V, Pourcher G, et al. Impact of  
589 HIV/simian immunodeficiency virus infection and viral proteins on adipose tissue fibrosis and  
590 adipogenesis. *AIDS.* 2019;33(6):953-64. Epub 2019/04/05. doi:  
591 10.1097/QAD.0000000000002168. PubMed PMID: 30946149.
- 592 33. Imle A, Kumberger P, Schnellbacher ND, Fehr J, Carrillo-Bustamante P, Ales J, et al.  
593 Experimental and computational analyses reveal that environmental restrictions shape HIV-1  
594 spread in 3D cultures. *Nat Commun.* 2019;10(1):2144. Epub 2019/05/16. doi: 10.1038/s41467-  
595 019-09879-3. PubMed PMID: 31086185; PubMed Central PMCID: PMC6514199.
- 596 34. Heydarian M, Yang T, Schweinlin M, Steinke M, Walles H, Rudel T, et al. Biomimetic  
597 Human Tissue Model for Long-Term Study of Neisseria gonorrhoeae Infection. *Frontiers in*  
598 *Microbiology.* 2019;10:1740. doi: 10.3389/fmicb.2019.01740. PubMed PMID: 31417529;  
599 PubMed Central PMCID: PMC6685398.
- 600 35. Radtke AL, Herbst-Kralovetz MM. Culturing and Applications of Rotating Wall Vessel  
601 Bioreactor Derived 3D Epithelial Cell Models. *Journal of visualized experiments : JoVE.*  
602 2012;(62). doi: 10.3791/3868.
- 603 36. Laniewski P, Gomez A, Hire G, So M, Herbst-Kralovetz MM. Human Three-Dimensional  
604 Endometrial Epithelial Cell Model To Study Host Interactions with Vaginal Bacteria and Neisseria  
605 gonorrhoeae. *Infect Immun.* 2017;85(3). Epub 2017/01/06. doi: 10.1128/IAI.01049-16. PubMed  
606 PMID: 28052997; PubMed Central PMCID: PMC5328489.
- 607 37. Laniewski P, Herbst-Kralovetz MM. Analysis of Host Responses to Neisseria gonorrhoeae  
608 Using a Human Three-Dimensional Endometrial Epithelial Cell Model. *Methods Mol Biol.*  
609 2019;1997:347-61. Epub 2019/05/24. doi: 10.1007/978-1-4939-9496-0\_20. PubMed PMID:  
610 31119633.

- 611 38. Heydarian M, Yang T, Schweinlin M, Steinke M, Walles H, Rudel T, et al. Biomimetic  
612 Human Tissue Model for Long-Term Study of Neisseria gonorrhoeae Infection. *Front Microbiol.*  
613 2019;10:1740. Epub 2019/08/17. doi: 10.3389/fmicb.2019.01740. PubMed PMID: 31417529;  
614 PubMed Central PMCID: PMC6685398.
- 615 39. Ilhan ZE, Laniewski P, Thomas N, Roe DJ, Chase DM, Herbst-Kralovetz MM. Deciphering  
616 the complex interplay between microbiota, HPV, inflammation and cancer through  
617 cervicovaginal metabolic profiling. *EBioMedicine.* 2019;44:675-90. Epub 2019/04/28. doi:  
618 10.1016/j.ebiom.2019.04.028. PubMed PMID: 31027917; PubMed Central PMCID:  
619 PMC6604110.
- 620 40. Doerflinger SY, Throop AL, Herbst-Kralovetz MM. Bacteria in the Vaginal Microbiome  
621 Alter the Innate Immune Response and Barrier Properties of the Human Vaginal Epithelia in a  
622 Species-Specific Manner. *The Journal of Infectious Diseases.* 2014. doi: 10.1093/infdis/jiu004.
- 623 41. Picollet-D'hahan N, Zuchowska A, Lemeunier I, Le Gac S. Multiorgan-on-a-Chip: A  
624 Systemic Approach To Model and Decipher Inter-Organ Communication. *Trends Biotechnol.*  
625 2021;39(8):788-810. Epub 2021/02/06. doi: 10.1016/j.tibtech.2020.11.014. PubMed PMID:  
626 33541718.
- 627 42. Tantengco OAG, Richardson LS, Medina PMB, Han A, Menon R. Organ-on-chip of the  
628 cervical epithelial layer: A platform to study normal and pathological cellular remodeling of the  
629 cervix. *FASEB J.* 2021;35(4):e21463. Epub 2021/03/11. doi: 10.1096/fj.202002590RRR. PubMed  
630 PMID: 33689188; PubMed Central PMCID: PMC68193817.
- 631 43. Choi NW, Cabodi M, Held B, Gleghorn JP, Bonassar LJ, Stroock AD. Microfluidic scaffolds  
632 for tissue engineering. *Nat Mater.* 2007;6(11):908-15. Epub 2007/10/02. doi:  
633 10.1038/nmat2022. PubMed PMID: 17906630.
- 634 44. Cabodi M, Choi NW, Gleghorn JP, Lee CS, Bonassar LJ, Stroock AD. A microfluidic  
635 biomaterial. *J Am Chem Soc.* 2005;127(40):13788-9. Epub 2005/10/06. doi: 10.1021/ja054820t.  
636 PubMed PMID: 16201789.
- 637 45. Edwards VL, Smith SB, McComb EJ, Tamarelle J, Ma B, Humphrys MS, et al. The  
638 Cervicovaginal Microbiota-Host Interaction Modulates Chlamydia trachomatis Infection. *mBio.*  
639 2019;10(4). Epub 2019/08/15. doi: 10.1128/mBio.01548-19. PubMed PMID: 31409678;  
640 PubMed Central PMCID: PMC6692509.
- 641 46. Buckner LR, Schust DJ, Ding J, Nagamatsu T, Beatty W, Chang TL, et al. Innate immune  
642 mediator profiles and their regulation in a novel polarized immortalized epithelial cell model  
643 derived from human endocervix. *Journal of reproductive immunology.* 2011;92(1-2):8-20. doi:  
644 10.1016/j.jri.2011.08.002. PubMed PMID: 21943934.
- 645 47. Nunn KL, Wang YY, Harit D, Humphrys MS, Ma B, Cone R, et al. Enhanced Trapping of HIV-  
646 1 by Human Cervicovaginal Mucus Is Associated with Lactobacillus crispatus-Dominant  
647 Microbiota. *mBio.* 2015;6(5):e01084-15. doi: 10.1128/mBio.01084-15. PubMed PMID:  
648 26443453; PubMed Central PMCID: PMC4611035.
- 649 48. Eggert-Kruse W, Botz I, Pohl S, Rohr G, Strowitzki T. Antimicrobial activity of human  
650 cervical mucus. *Hum Reprod.* 2000;15(4):778-84. Epub 2000/03/31. doi:  
651 10.1093/humrep/15.4.778. PubMed PMID: 10739819.
- 652 49. Powell DW. Barrier function of epithelia. *Am J Physiol.* 1981;241(4):G275-88. Epub  
653 1981/10/01. doi: 10.1152/ajpgi.1981.241.4.G275. PubMed PMID: 7032321.
- 654 50. Adnane M, Meade KG, O'Farrelly C. Cervico-vaginal mucus (CVM) - an accessible source of  
655 immunologically informative biomolecules. *Vet Res Commun.* 2018;42(4):255-63. Epub  
656 2018/08/18. doi: 10.1007/s11259-018-9734-0. PubMed PMID: 30117040; PubMed Central  
657 PMCID: PMC6244541.

- 658 51. Han L, Andrews W, Wong K, Jensen JT. Conditionally Reprogrammed Macaque  
659 Endocervical Cells Retain Steroid Receptor Expression and Produce Mucus. *Biol Reprod.* 2020.  
660 Epub 2020/04/02. doi: 10.1093/biolre/ioaa039. PubMed PMID: 32232331.
- 661 52. Anderson DJ, Marathe J, Pudney J. The structure of the human vaginal stratum corneum  
662 and its role in immune defense. *American journal of reproductive immunology.* 2014;71(6):618-  
663 23. Epub 2014/03/26. doi: 10.1111/aji.12230. PubMed PMID: 24661416; PubMed Central  
664 PMCID: PMC4024347.
- 665 53. Buckner LR, Lewis ME, Greene SJ, Foster TP, Quayle AJ. Chlamydia trachomatis infection  
666 results in a modest pro-inflammatory cytokine response and a decrease in T cell chemokine  
667 secretion in human polarized endocervical epithelial cells. *CYTOKINE.* 2013;63(2):151-65. doi:  
668 10.1016/j.cyto.2013.04.022. PubMed PMID: 23673287; PubMed Central PMCID:  
669 PMCPMC3703936.
- 670 54. Yang C, Briones M, Chiou J, Lei L, Patton MJ, Ma L, et al. Chlamydia trachomatis  
671 Lipopolysaccharide Evades the Canonical and Noncanonical Inflammatory Pathways To Subvert  
672 Innate Immunity. *mBio.* 2019;10(2). Epub 2019/04/25. doi: 10.1128/mBio.00595-19. PubMed  
673 PMID: 31015326; PubMed Central PMCID: PMC6479002.
- 674 55. Hwang LY, Scott ME, Ma Y, Moscicki AB. Diversity of Cervicovaginal Cytokine Response to  
675 Incident Chlamydia trachomatis Infection Among a Prospective Cohort of Young Women. *Am J*  
676 *Reprod Immunol.* 2015;74(3):228-36. Epub 2015/05/21. doi: 10.1111/aji.12401. PubMed PMID:  
677 25989718; PubMed Central PMCID: PMC4564257.
- 678 56. Bua A, Cannas S, Zanetti S, Molicotti P. Levels of different cytokines in women and men  
679 with asymptomatic genital infection caused by Chlamydia. *J Infect Dev Ctries.* 2019;13(9):847-  
680 50. Epub 2020/02/20. doi: 10.3855/jidc.9810. PubMed PMID: 32074096.
- 681 57. Unemo M, Seifert HS, Hook EW, 3rd, Hawkes S, Ndowa F, Dillon JR. Gonorrhoea. *Nat Rev*  
682 *Dis Primers.* 2019;5(1):79. Epub 2019/11/23. doi: 10.1038/s41572-019-0128-6. PubMed PMID:  
683 31754194.
- 684 58. Batteiger BE, Fraiz J, Newhall WJ, Katz BP, Jones RB. Association of recurrent chlamydial  
685 infection with gonorrhea. *J Infect Dis.* 1989;159(4):661-9. Epub 1989/04/01. doi:  
686 10.1093/infdis/159.4.661. PubMed PMID: 2926160.
- 687 59. Creighton S, Tenant-Flowers M, Taylor CB, Miller R, Low N. Co-infection with gonorrhoea  
688 and chlamydia: how much is there and what does it mean? *Int J STD AIDS.* 2003;14(2):109-13.  
689 Epub 2003/03/29. doi: 10.1258/095646203321156872. PubMed PMID: 12662389.
- 690 60. Edwards VL, Wang L-C, Dawson V, Stein DC, Song W. Neisseria gonorrhoeae breaches the  
691 apical junction of polarized epithelial cells for transmigration by activating EGFR. *Cellular*  
692 *Microbiology.* 2013;15(6):1042-57. doi: 10.1111/cmi.12099. PubMed PMID:  
693 WOS:000318931800014.
- 694 61. Jarvis GA, Li J, Swanson KV. Invasion of human mucosal epithelial cells by Neisseria  
695 gonorrhoeae upregulates expression of intercellular adhesion molecule 1 (ICAM-1). *Infect*  
696 *Immun.* 1999;67(3):1149-56. Epub 1999/02/20. PubMed PMID: 10024555; PubMed Central  
697 PMCID: PMC96441.
- 698 62. Spurbeck RR, Arvidson CG. Inhibition of Neisseria gonorrhoeae epithelial cell interactions  
699 by vaginal Lactobacillus species. *Infection and immunity.* 2008;76(7):3124-30. doi:  
700 10.1128/IAI.00101-08. PubMed PMID: 18411284; PubMed Central PMCID: PMC2446695.
- 701 63. Griffiss JM, Lammel CJ, Wang J, Dekker NP, Brooks GF. Neisseria gonorrhoeae coordinately  
702 uses Pili and Opa to activate HEC-1-B cell microvilli, which causes engulfment of the gonococci.  
703 *Infect Immun.* 1999;67(7):3469-80. Epub 1999/06/22. PubMed PMID: 10377128; PubMed  
704 Central PMCID: PMC116533.

- 705 64. Ma B, Forney LJ, Ravel J. Vaginal microbiome: rethinking health and disease. *Annu Rev*  
706 *Microbiol.* 2012;66:371-89. Epub 2012/07/04. doi: 10.1146/annurev-micro-092611-150157.  
707 PubMed PMID: 22746335.
- 708 65. McKinnon LR, Achilles S, Bradshaw CS, Burgener A, Crucitti T, Fredricks DN, et al. The  
709 evolving facets of bacterial vaginosis: implications for HIV transmission. *AIDS Res Hum*  
710 *Retroviruses.* 2019. Epub 2019/01/15. doi: 10.1089/AID.2018.0304. PubMed PMID: 30638028.
- 711 66. Witkin SS, Mendes-Soares H, Linhares IM, Jayaram A, Ledger WJ, Forney LJ. Influence of  
712 vaginal bacteria and D- and L-lactic acid isomers on vaginal extracellular matrix  
713 metalloproteinase inducer: implications for protection against upper genital tract infections.  
714 *MBio.* 2013;4(4). Epub 2013/08/06. doi: 10.1128/mBio.00460-13. PubMed PMID: 23919998;  
715 PubMed Central PMCID: PMC3735189.
- 716 67. Boskey ER, Cone RA, Whaley KJ, Moench TR. Origins of vaginal acidity: high D/L lactate  
717 ratio is consistent with bacteria being the primary source. *Hum Reprod.* 2001;16(9):1809-13.  
718 PubMed PMID: 11527880.
- 719 68. O'Hanlon DE, Moench TR, Cone RA. Vaginal pH and microbicidal lactic acid when  
720 lactobacilli dominate the microbiota. *PLoS One.* 2013;8(11):e80074. Epub 2013/11/06. doi:  
721 10.1371/journal.pone.0080074. PubMed PMID: 24223212; PubMed Central PMCID:  
722 PMC3819307.
- 723 69. Barrila J, Radtke AL, Crabbe A, Sarker SF, Herbst-Kralovetz MM, Ott CM, et al. Organotypic  
724 3D cell culture models: using the rotating wall vessel to study host-pathogen interactions. *Nat*  
725 *Rev Microbiol.* 2010;8(11):791-801. Epub 2010/10/16. doi: 10.1038/nrmicro2423. PubMed  
726 PMID: 20948552.
- 727 70. David J, Sayer NM, Sarkar-Tyson M. The use of a three-dimensional cell culture model to  
728 investigate host-pathogen interactions of *Francisella tularensis* in human lung epithelial cells.  
729 *Microbes Infect.* 2014;16(9):735-45. Epub 2014/05/07. doi: 10.1016/j.micinf.2014.04.001.  
730 PubMed PMID: 24796635.
- 731 71. Aiyar A, Quayle AJ, Buckner LR, Sherchand SP, Chang TL, Zea AH, et al. Influence of the  
732 tryptophan-indole-IFN $\gamma$  axis on human genital *Chlamydia trachomatis* infection: role of  
733 vaginal co-infections. *Front Cell Infect Microbiol.* 2014;4:72. Epub 2014/06/12. doi:  
734 10.3389/fcimb.2014.00072. PubMed PMID: 24918090; PubMed Central PMCID:  
735 PMC4042155.
- 736 72. Ziklo N, Huston WM, Taing K, Katouli M, Timms P. In vitro rescue of genital strains of  
737 *Chlamydia trachomatis* from interferon-gamma and tryptophan depletion with indole-positive,  
738 but not indole-negative *Prevotella* spp. *BMC Microbiol.* 2016;16(1):286. Epub 2016/12/05. doi:  
739 10.1186/s12866-016-0903-4. PubMed PMID: 27914477; PubMed Central PMCID:  
740 PMC5135834.
- 741 73. Ziklo N, Vidgen ME, Taing K, Huston WM, Timms P. Dysbiosis of the Vaginal Microbiota  
742 and Higher Vaginal Kynurenine/Tryptophan Ratio Reveals an Association with *Chlamydia*  
743 *trachomatis* Genital Infections. *Front Cell Infect Microbiol.* 2018;8:1. Epub 2018/02/07. doi:  
744 10.3389/fcimb.2018.00001. PubMed PMID: 29404279; PubMed Central PMCID:  
745 PMC5778109.
- 746 74. Shemer Y, Sarov I. Inhibition of growth of *Chlamydia trachomatis* by human gamma  
747 interferon. *Infect Immun.* 1985;48(2):592-6. Epub 1985/05/01. PubMed PMID: 2985506;  
748 PubMed Central PMCID: PMC261392.
- 749 75. Yildirim S, Yeoman CJ, Janga SC, Thomas SM, Ho M, Leigh SR, et al. Primate vaginal  
750 microbiomes exhibit species specificity without universal *Lactobacillus* dominance. *The ISME*  
751 *Journal.* 2014;8(12):2431-44. doi: 10.1038/ismej.2014.90.

- 752 76. Stumpf RM, Wilson BA, Rivera A, Yildirim S, Yeoman CJ, Polk JD, et al. The primate vaginal  
753 microbiome: Comparative context and implications for human health and disease. *American*  
754 *Journal of Physical Anthropology*. 2013. doi: 10.1002/ajpa.22395. PubMed PMID: 24166771.
- 755 77. Miller EA, Beasley DE, Dunn RR, Archie EA. Lactobacilli Dominance and Vaginal pH: Why  
756 Is the Human Vaginal Microbiome Unique? *Front Microbiol*. 2016;7:1936. Epub 2016/12/23. doi:  
757 10.3389/fmicb.2016.01936. PubMed PMID: 28008325; PubMed Central PMCID:  
758 PMCPMC5143676.
- 759 78. Tan C, Hsia RC, Shou H, Carrasco JA, Rank RG, Bavoil PM. Variable expression of surface-  
760 exposed polymorphic membrane proteins in in vitro-grown *Chlamydia trachomatis*. *Cell*  
761 *Microbiol*. 2010;12(2):174-87. doi: 10.1111/j.1462-5822.2009.01389.x. PubMed PMID:  
762 19811502; PubMed Central PMCID: PMCPMC3073146.
- 763 79. Reeve P, Owen J, Oriel JD. Laboratory procedures for the isolation of chlamydia  
764 *trachomatis* from the human genital tract. *J Clin Pathol*. 1975;28(11):910-4. Epub 1975/11/01.  
765 doi: 10.1136/jcp.28.11.910. PubMed PMID: 1236632; PubMed Central PMCID: PMCPMC475892.
- 766 80. Meaburn KJ. Fluorescence in situ hybridization on 3D cultures of tumor cells. *Methods*  
767 *Mol Biol*. 2010;659:323-36. Epub 2010/09/03. doi: 10.1007/978-1-60761-789-1\_25. PubMed  
768 PMID: 20809324.
- 769 81. Ball LM, Criss AK. Constitutively Opa-expressing and Opa-deficient neisseria gonorrhoeae  
770 strains differentially stimulate and survive exposure to human neutrophils. *Journal of*  
771 *bacteriology*. 2013;195(13):2982-90. doi: 10.1128/JB.00171-13. PubMed PMID: 23625842;  
772 PubMed Central PMCID: PMCPMC3697530.
- 773 82. Smirnov A, Daily KP, Criss AK. Assembly of NADPH oxidase in human neutrophils is  
774 modulated by the opacity-associated protein expression State of *Neisseria gonorrhoeae*. *Infect*  
775 *Immun*. 2014;82(3):1036-44. Epub 2013/12/18. doi: 10.1128/IAI.00881-13. PubMed PMID:  
776 24343654; PubMed Central PMCID: PMCPMC3957997.
- 777 83. White LA, Kellogg DS, Jr. *Neisseria Gonorrhoeae* Identification in Direct Smears by a  
778 Fluorescent Antibody-Counterstain Method. *Appl Microbiol*. 1965;13:171-4. Epub 1965/03/01.  
779 PubMed PMID: 14325874; PubMed Central PMCID: PMCPMC1058216.
- 780
- 781
- 782

783 **Supplemental Materials**

- 784 Transwell inserts (Corning #3472)
- 785 12 well plates (Corning #3513)
- 786 9” Glass pipettes (Corning #7095D)
- 787 Countess Automated Cell Counter (Invitrogen #C10227)
- 788 Mouse anti-human chlamydia LPS (US Biological #C4250-51F)
- 789 Goat anti-mouse Alexa Fluor 488 (Invitrogen #A-11029)
- 790 Rabbit anti-human MUC5B (Invitrogen #PA5-82342)
- 791 Goat anti-rabbit Alexa Fluor 488 (Invitrogen #A-11034)
- 792 Hoechst (Invitrogen #H3570)
- 793 FISH probe - EUB338-ATTO [5’-/565/GCT GCC TCC CGT AGG AGT-3’] (Invitrogen)
- 794 Histology fixative – 10% formalin solution (Sigma #HT501128)
- 795 D/L Lactic acid assay kit (R-Biopharm #11 112 821 035)
- 796
- 797 Rat tail collagen – 100mg (Corning #354236)
- 798 10X RPMI media (Sigma #R1145)
- 799 Sterile tissue culture water (Cellgro #25-055-CM)
- 800 1M NaOH – sterile filtered (Sigma #S5881)
- 801 0.25% Trypsin (Gibco #25200-056)
- 802 BJ human fibroblasts (ATCC #CRL 2522)
- 803 BJ complete media - DMEM media (Cellgro #15-013-CV) supplemented with 10% FBS (Sigma
- 804 #F4135)
- 805 A2EN cervical epithelial cells (kindly provided by Dr. Allsion Quayle [46])
- 806 A2EN complete media - EpiLife media (Gibco #MEPICFPRF) with 100X EDGS supplement (Gibco
- 807 #S-012-5) and 100X L glutamine (Lonza #17-605E)
- 808 VK2/E6/E7 human vaginal epithelial cells (ATCC #CRL 2616)
- 809 VK2 complete media - Keratinocyte-SFM (with BPE and EGF) (Gibco 310725-018) supplemented
- 810 with Calcium chloride (Amresco #E506) and 100X L glutamine (Lonza #17-605E)
- 811 HeLa cervical epithelial cells (ATCC #CCL2)
- 812 HeLa complete media - Dulbecco’s modified Eagle’s medium (Corning #15-013-CV) supplemented
- 813 with 10% FBS (Sigma #F4135)
- 814 HEC-1-B endometrial cells (ATCC #HTB-113)

815 HEC-1-B complete media – MEM alpha (1X) + GlutMaAX (GIBCO #32561-037) supplemented with  
816 10% FBS (Sigma #F4135)  
817  
818 *Chlamydia trachomatis* serovar LGV II strain 434 (ATCC #VR 902B)  
819 *Neisseria gonorrhoeae* strain FA1090 – wildtype and isogenic mutants (kindly provided by Dr. Alison  
820 Criss [81, 82]  
821 *Lactobacillus crispatus* (ATCC #33197)  
822 *Lactobacillus iners* (ATCC #55195)  
823 *Gardnerella vaginalis* (ATCC #14018)  
824 Difco GC medium base (BD #228920) with 1% Kelloggs supplement prepared as per White and  
825 Kellogg [83].  
826 Bacteriological agar (Amresco #J637)  
827 NYCIII medium: 10 g/L proteose peptone, 10 g/l beef extract, 5 g/l yeast extract, 5 g/L NaCl, 1.2 g/L  
828 MgSO<sub>4</sub>, 2 g/L MnSO<sub>4</sub>.H<sub>2</sub>O, 5.7 g/L K<sub>2</sub>HPO<sub>4</sub>, 20 g/L glucose, 10% FBS.  
829 Tryptic Soy Broth (Fluka #T8907) supplemented with 5% Horse serum (GIBCO #26050-088)  
830  
831



## Figures and Figure Legends:

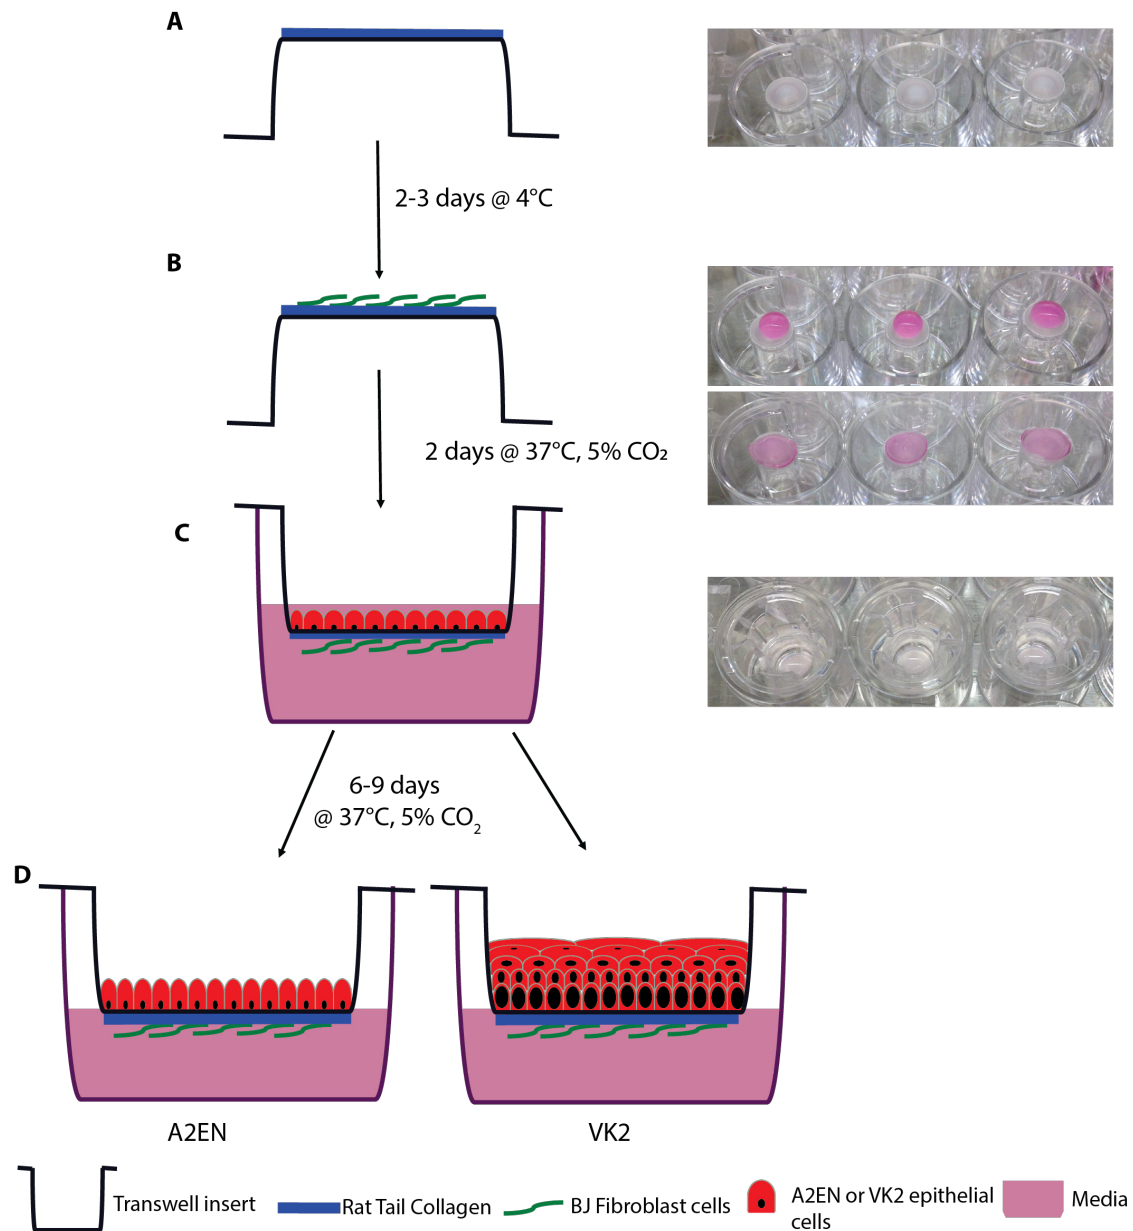

**FIG 1** Model setup. 70 $\mu$ l of collagen was added to the basal portion of the inverted transwell (A) and stored at 4°C. BJ's were added to the basal membrane 2-3 days later at  $3 \times 10^4$  in a volume of 80-100 $\mu$ l and incubated at 37°C, 5%CO<sub>2</sub> (B). Epithelial cells (A2EN or VK2) were apically added at  $1 \times 10^5$  in a volume of 50-200 $\mu$ l (C). After 6-9 days incubation at 37°C, 5%CO<sub>2</sub> cells were ready to be used in experiments.

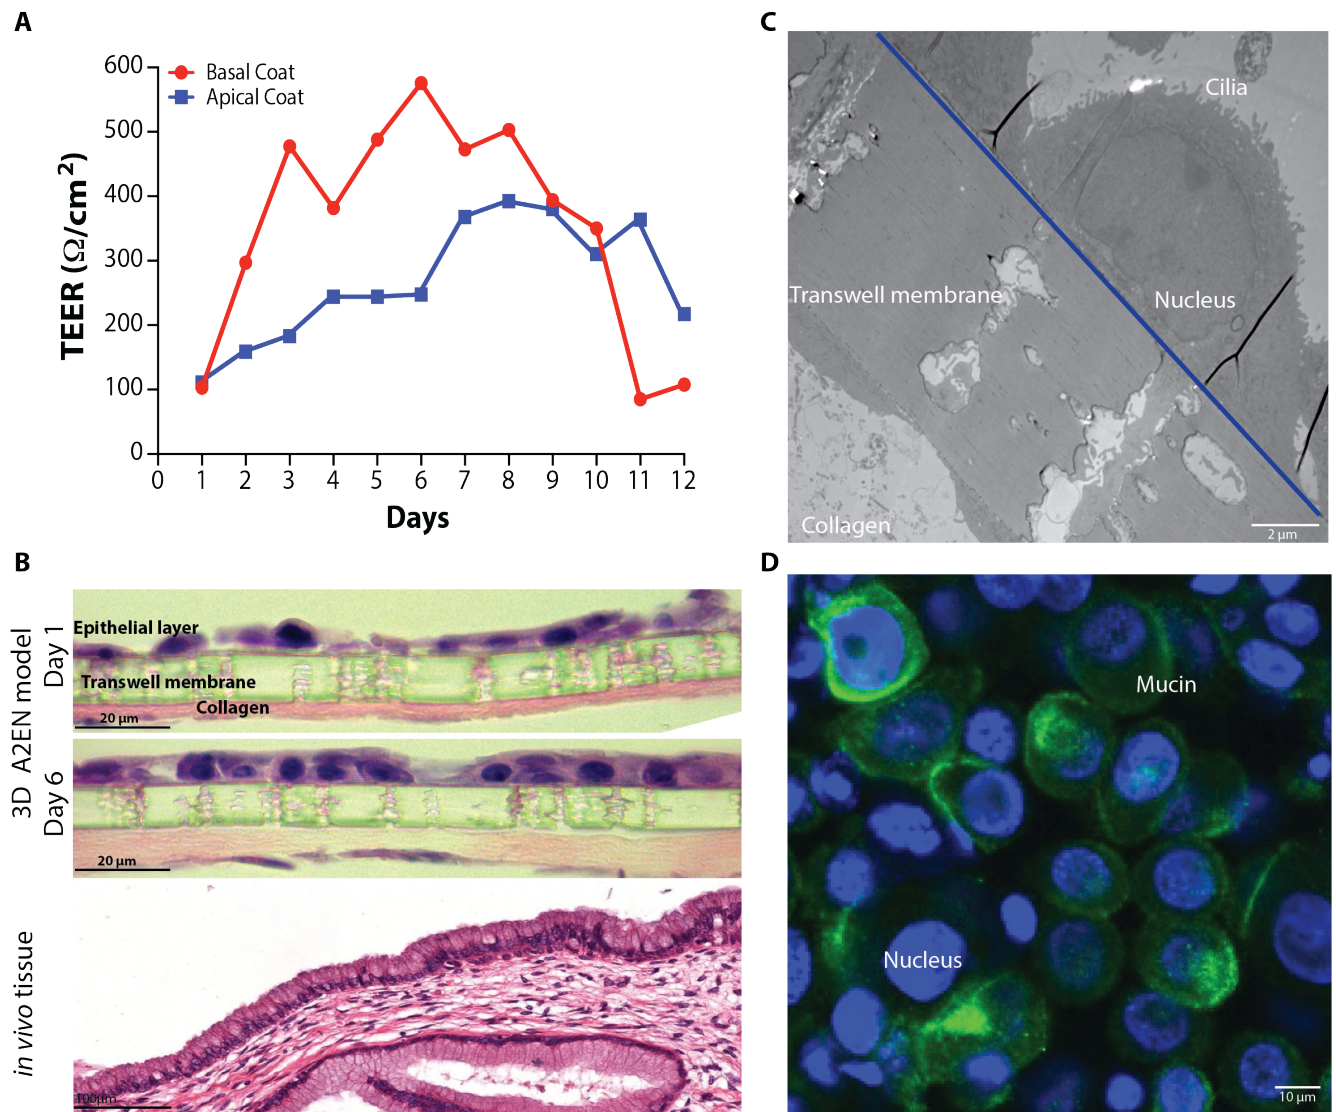

**FIG 2** Characterization of the 3D cervical epithelium model (A2EN). Transepithelial resistance values over the course of A2EN epithelial cell transwell 3D model set up (A). Histology (H&E) imaging (B) and electron microscopy (TEM) imaging (C) of the epithelial cells of the model 6 days post set up. Confocal imaging of mucin gel formation (MUC-5B) on the model 6 days post set up (D).

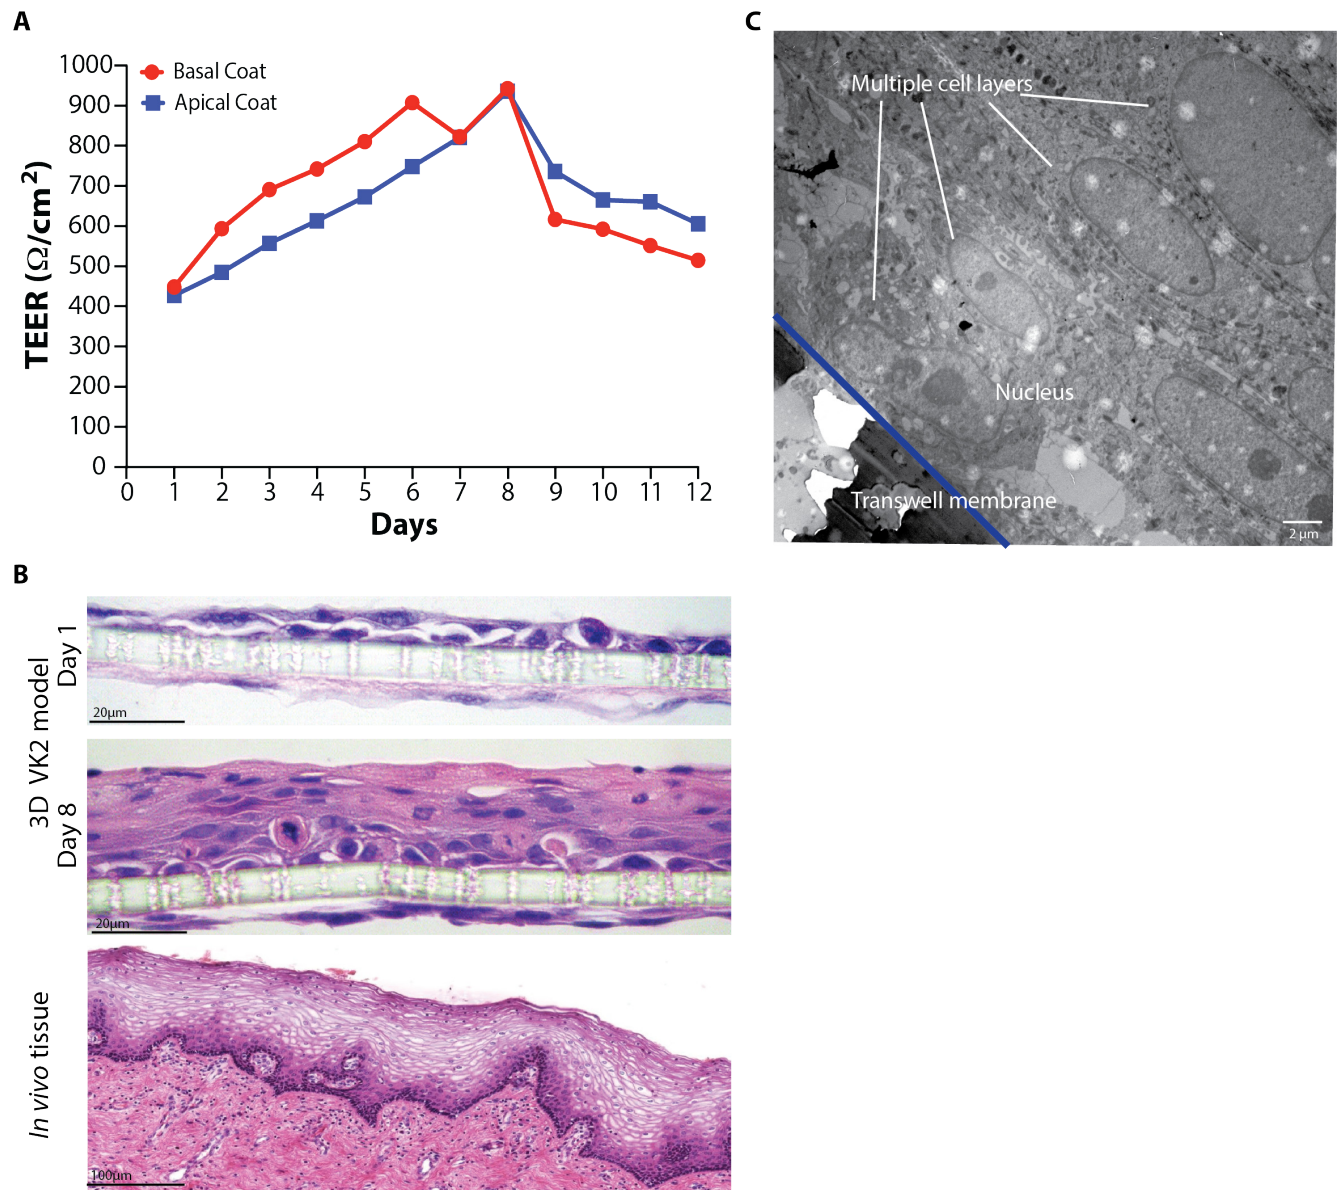

**FIG 3** Characterization of the 3D vaginal epithelium model (VK2). Transepithelial resistance values over the course of VK2 epithelial cell transwell 3D model set up (A). Histology (H&E) imaging (B) and electron microscopy (TEM) imaging (C) of the epithelial cells of the model 8 days post set up.

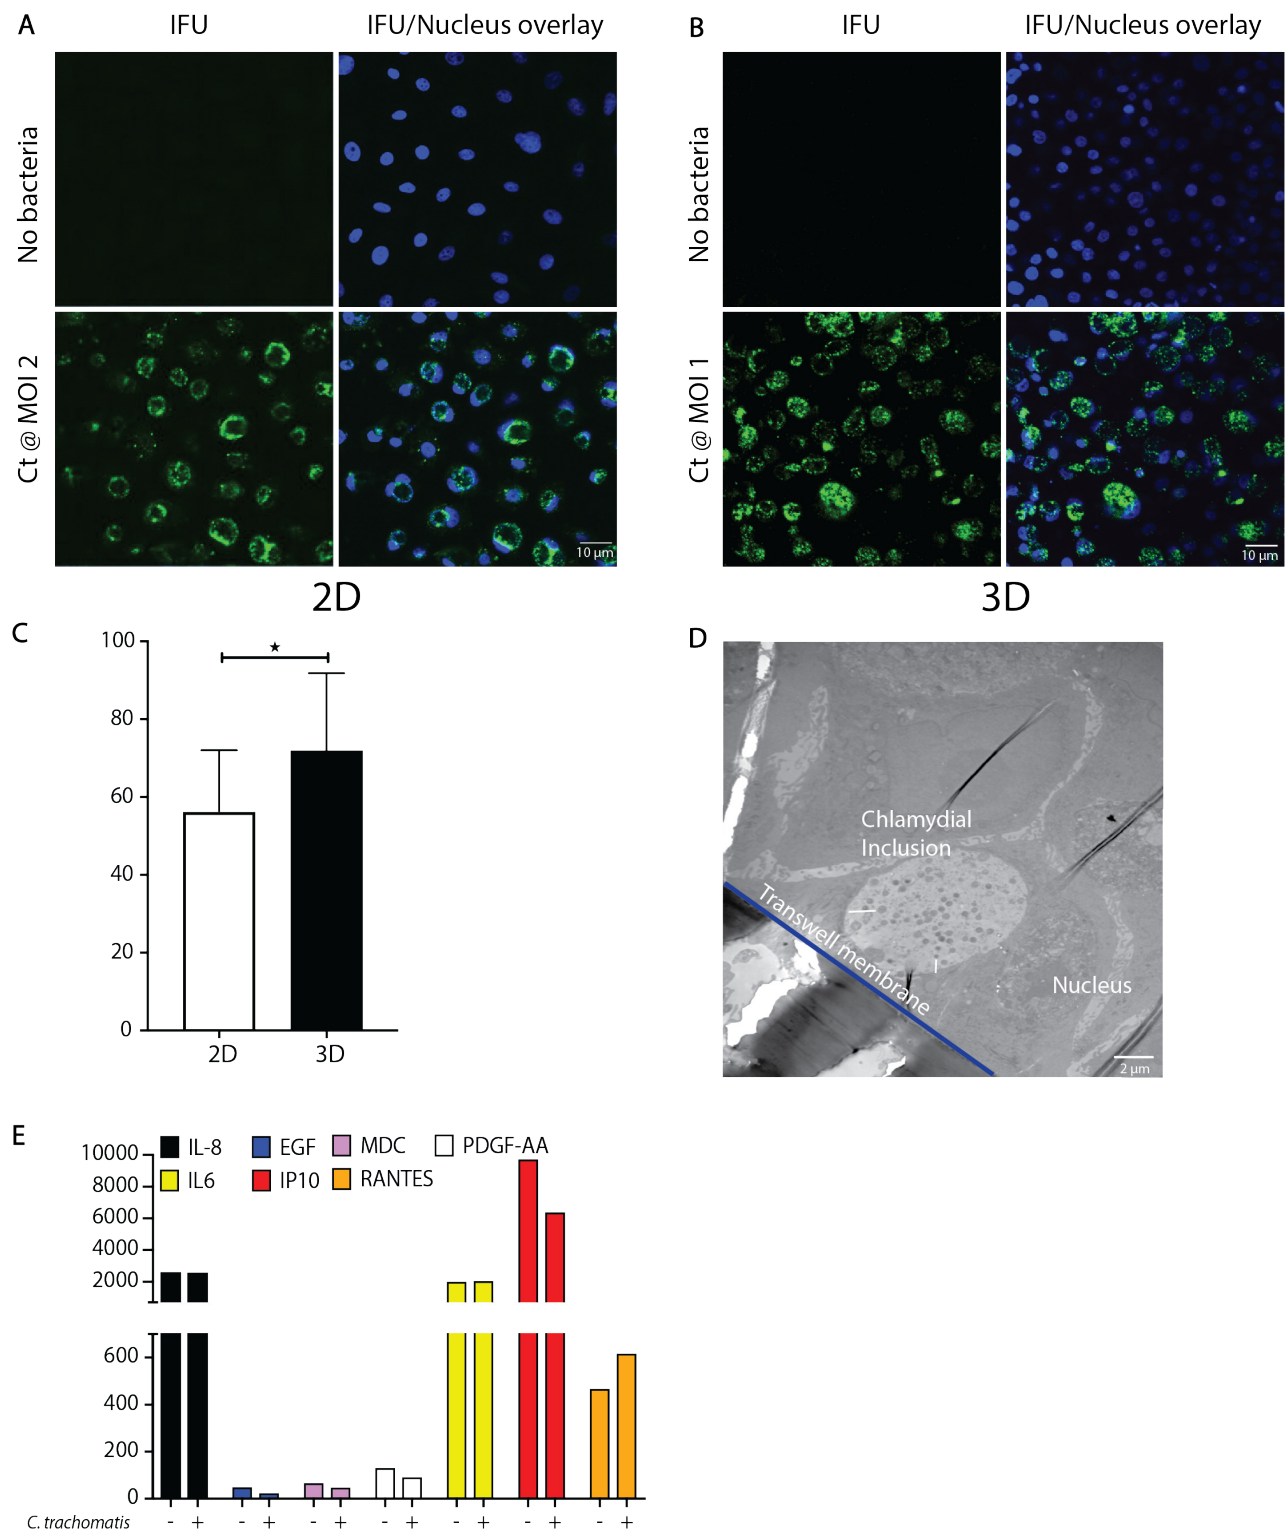

**FIG 4** Infection of the 3D cervical model (A2EN) by *C. trachomatis*. Analysis of chlamydial infectivity on the conventional 2D (coverslip) model by fluorescent imaging (A) compared to the 3D (transwell) model (B) and resultant enumeration of infected cells (C). TEM image of infected cells on the 3D model (D). Cytokine profile of uninfected as compared to infected 3D cervical cells (E).

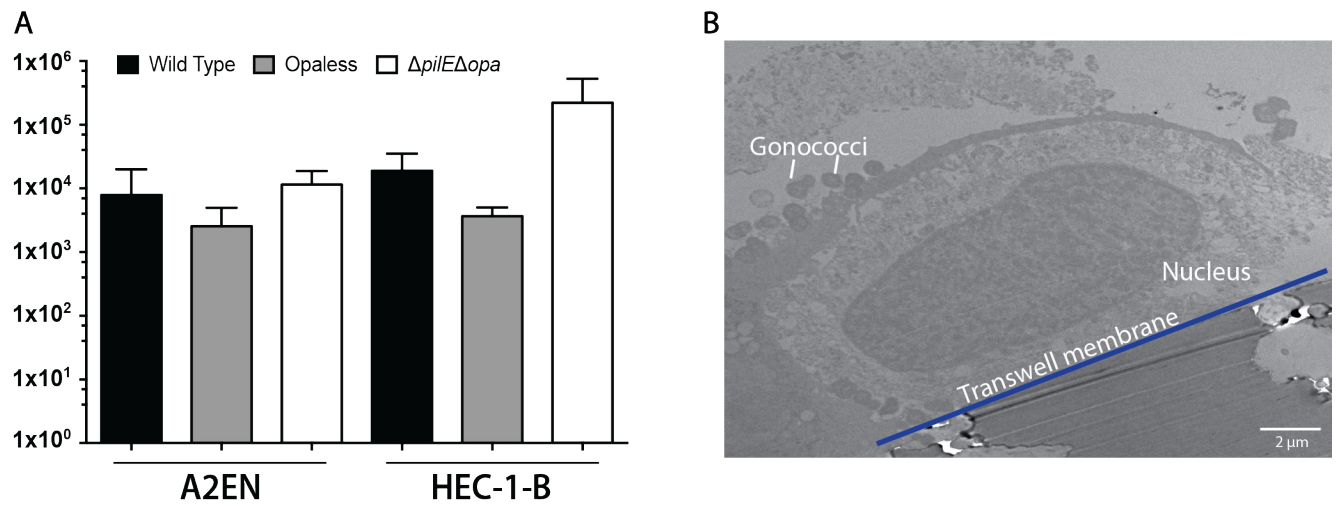

**FIG 5** Infection of the 3D cervical cells (A2EN) by *N. gonorrhoeae* (Gc). Transmigration of Gc across the cervical epithelium model is similar to that obtained with a commonly used cell line (HEC-1-B) (A). TEM image of Gc attached to 3D cervical epithelial cells (B).

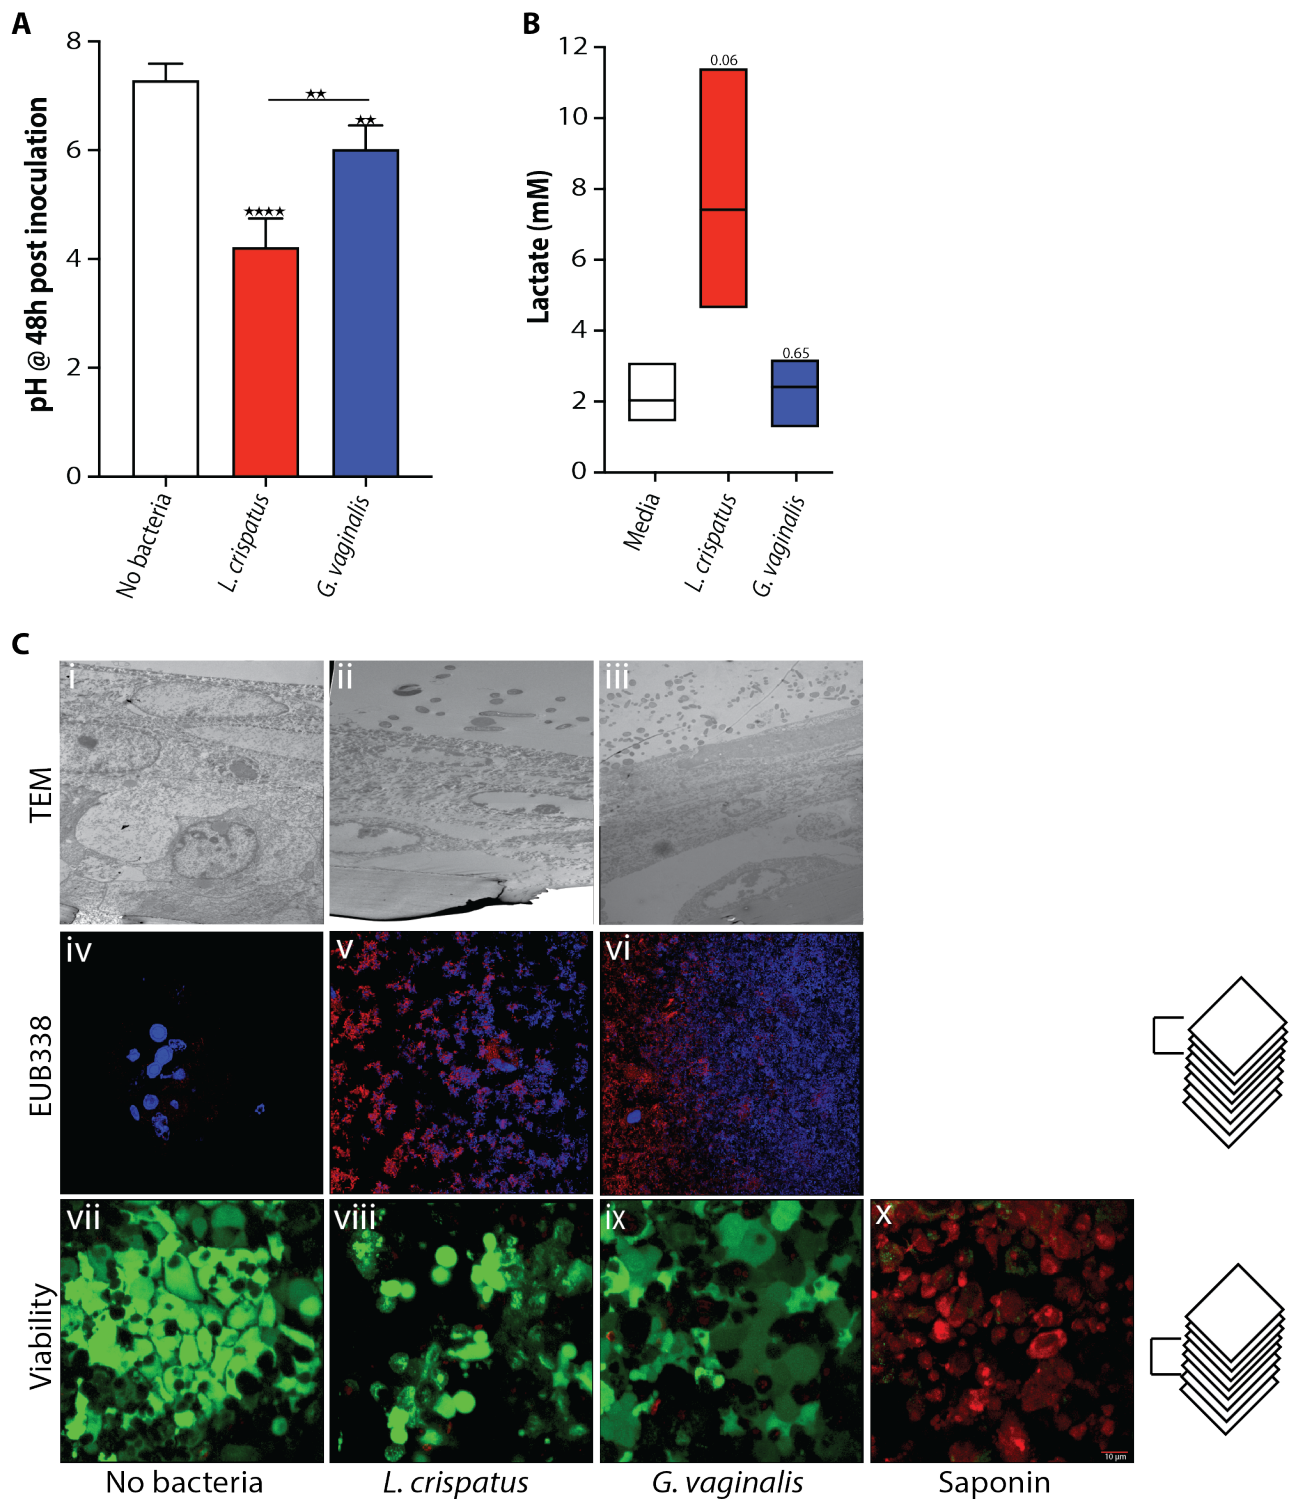

**FIG 6** The 3D vaginal (VK2) epithelium model supports the growth of vaginal bacteria. pH (A) and D(-) lactate concentrations (B) of apical media after 48h of anaerobic bacterial growth on 3D VK2 cells. TEM, FISH and viability images of bacteria and host cells after 48h of growth (C).
